# Supplementary material
Source: PubMed Central journal article supplement (PMC2856487)

**Biologically Active Tetranorditerpenoids from the Fungus *Sclerotinia homoeocarpa*, Causal Agent of Dollar Spot in Turfgrass**

H. M. T. Bandara Herath, Wimal H. M. W. Herath, Paulo Carvalho, Shabana I. Khan, Babu L.

Tekwani, Stephen O. Duke, Maria Tomaso-Peterson, and N. P. Dhammika Nanayakkara

**Contents**

1H NMR spectrum of compound 1  
13 C NMR spectrum of compound 1  
1H NMR spectrum of compound 2  
13 C NMR spectrum of compound 2  
1H NMR spectrum of compound 3  
13 C NMR spectrum of compound 3  
1H NMR spectrum of compound 4  
13 C NMR spectrum of compound 4  
1H NMR spectrum of compound 5  
13 C NMR spectrum of compound 5  
1H NMR spectrum of compound 6  
13 C NMR spectrum of compound 6  
1H NMR spectrum of compound 7  
13 C NMR spectrum of compound 7  
1H NMR spectrum of compound 8  
13 C NMR spectrum of compound 8  
1H NMR spectrum of compound 9  
13 C NMR spectrum of compound 9  
1H NMR spectrum of compound 10  
13 C NMR spectrum of compound 10

7 6 5 4 3 2 1 ppm

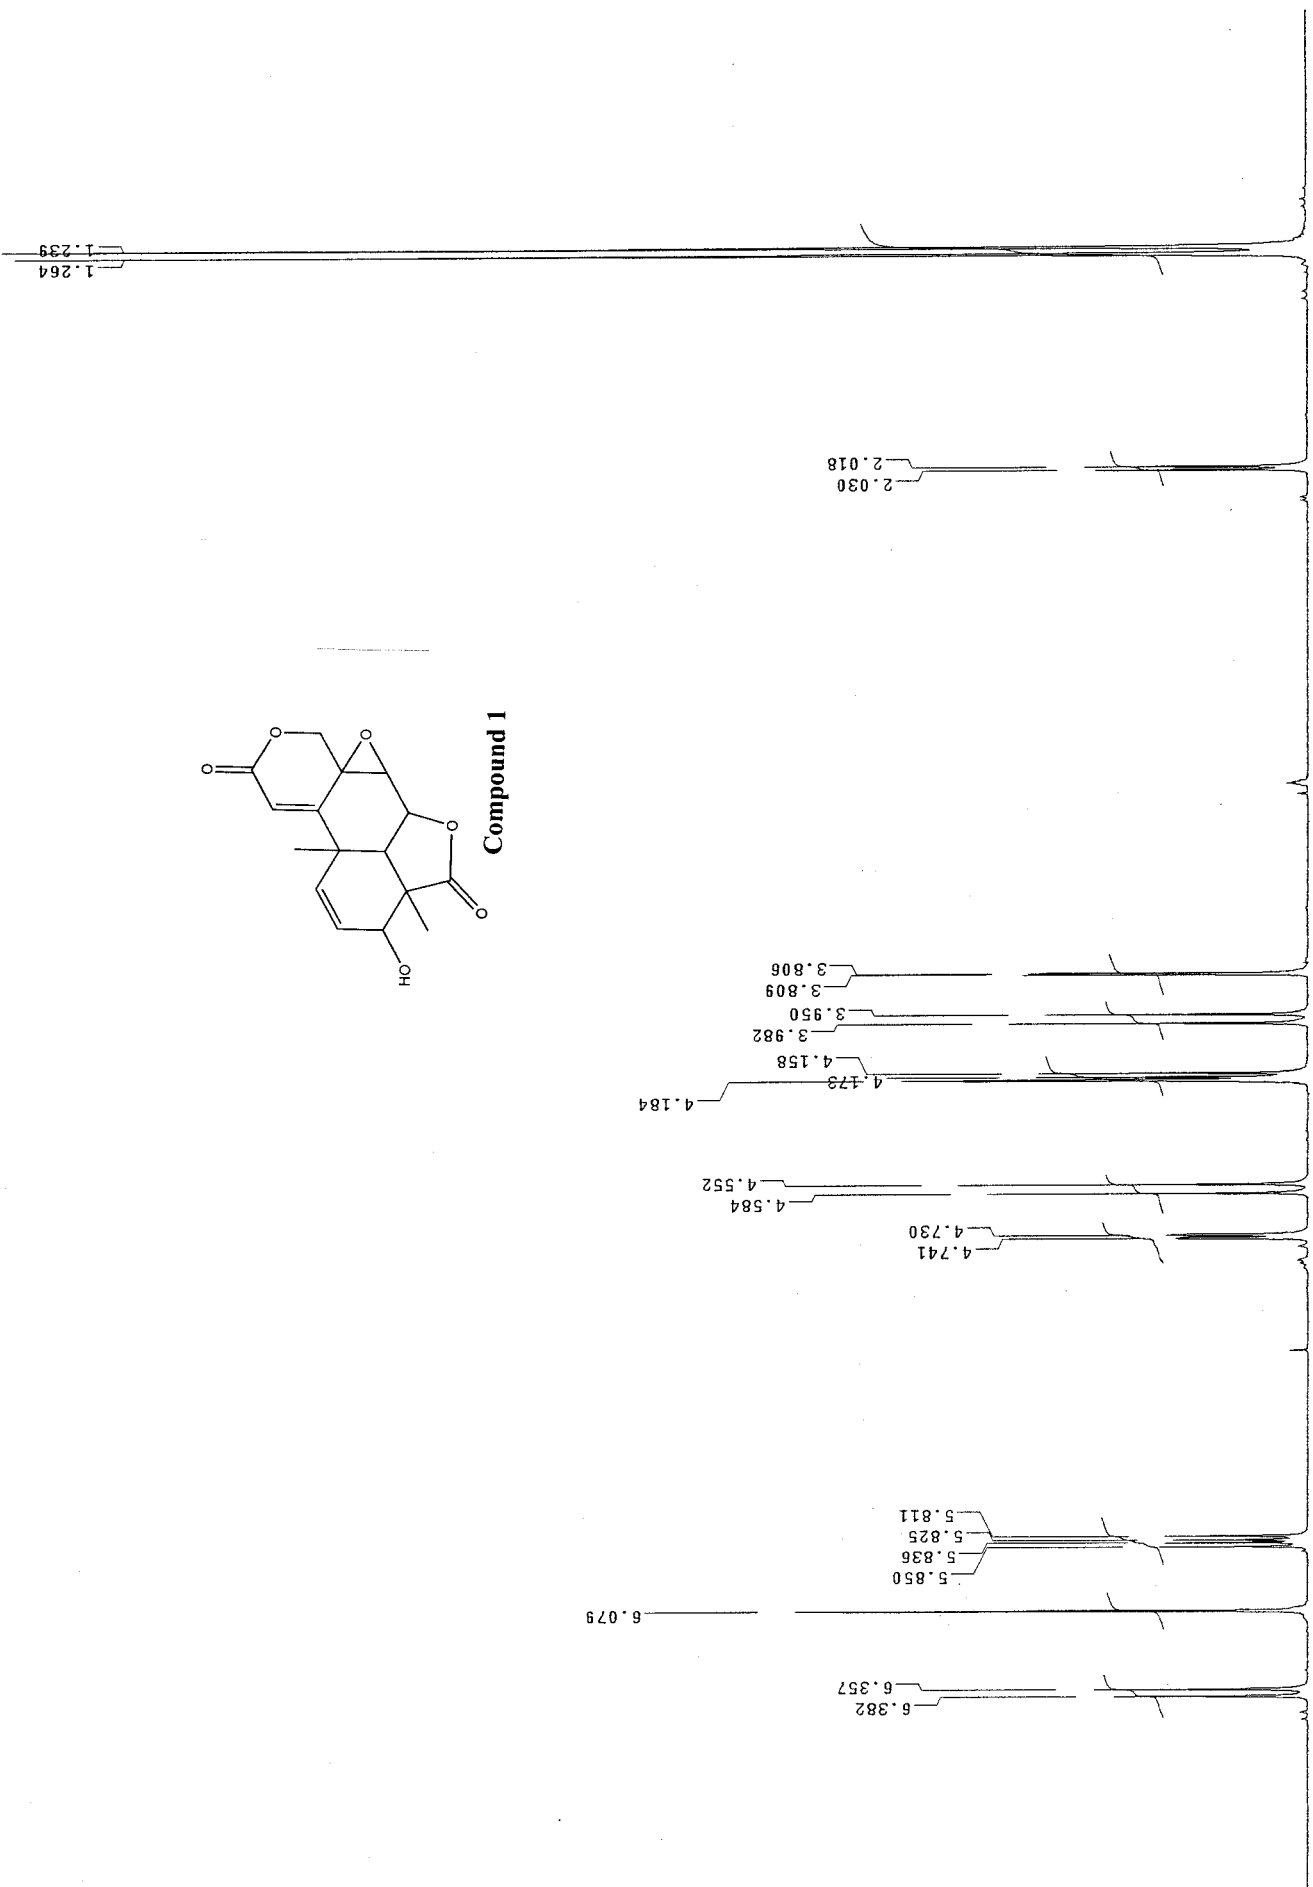

Compound 1

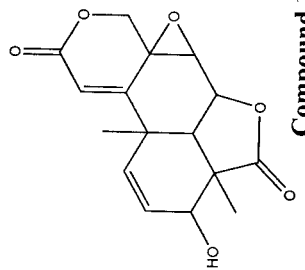

77.683  
77.013

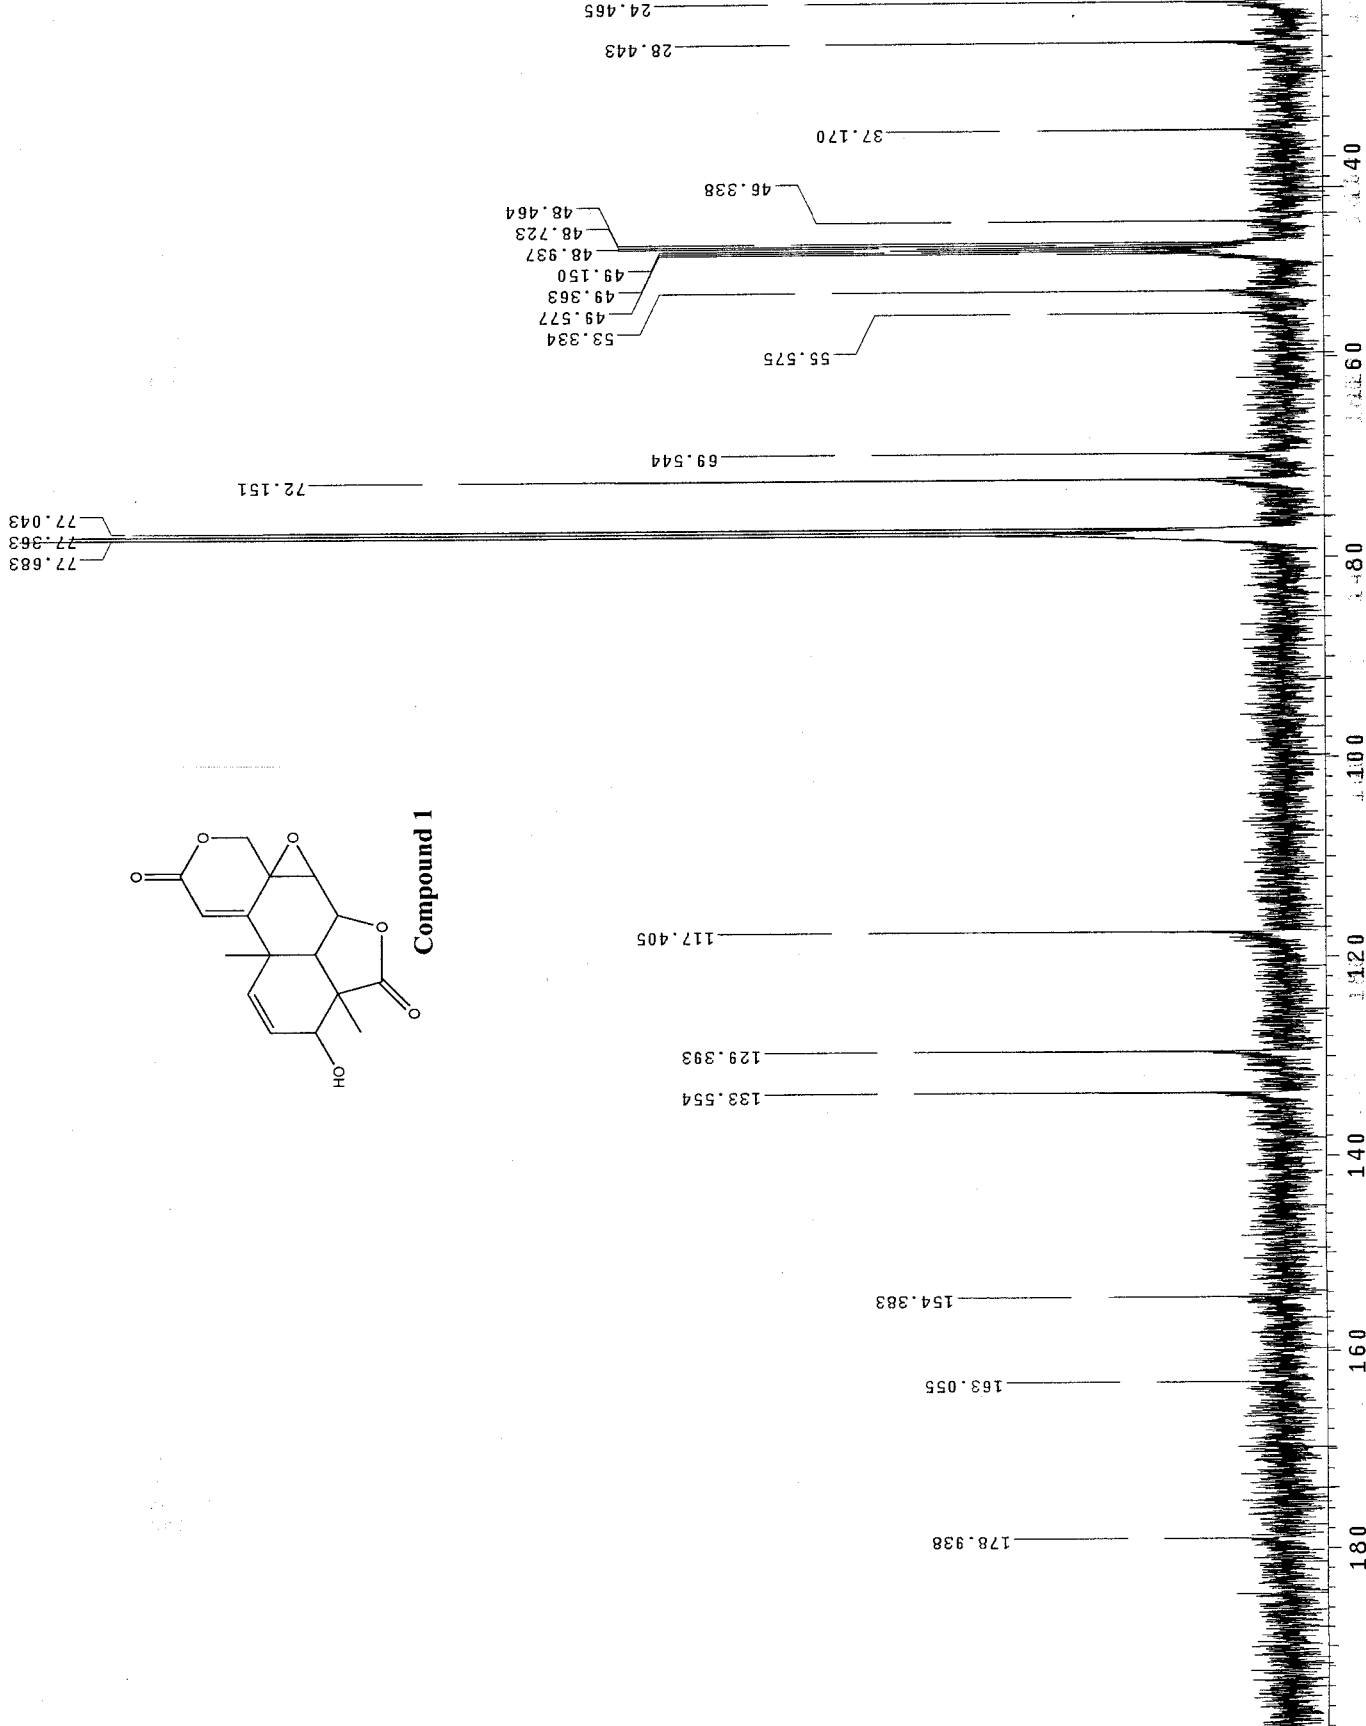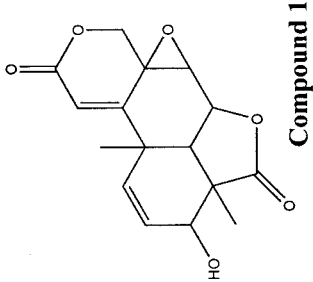

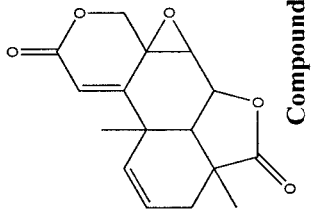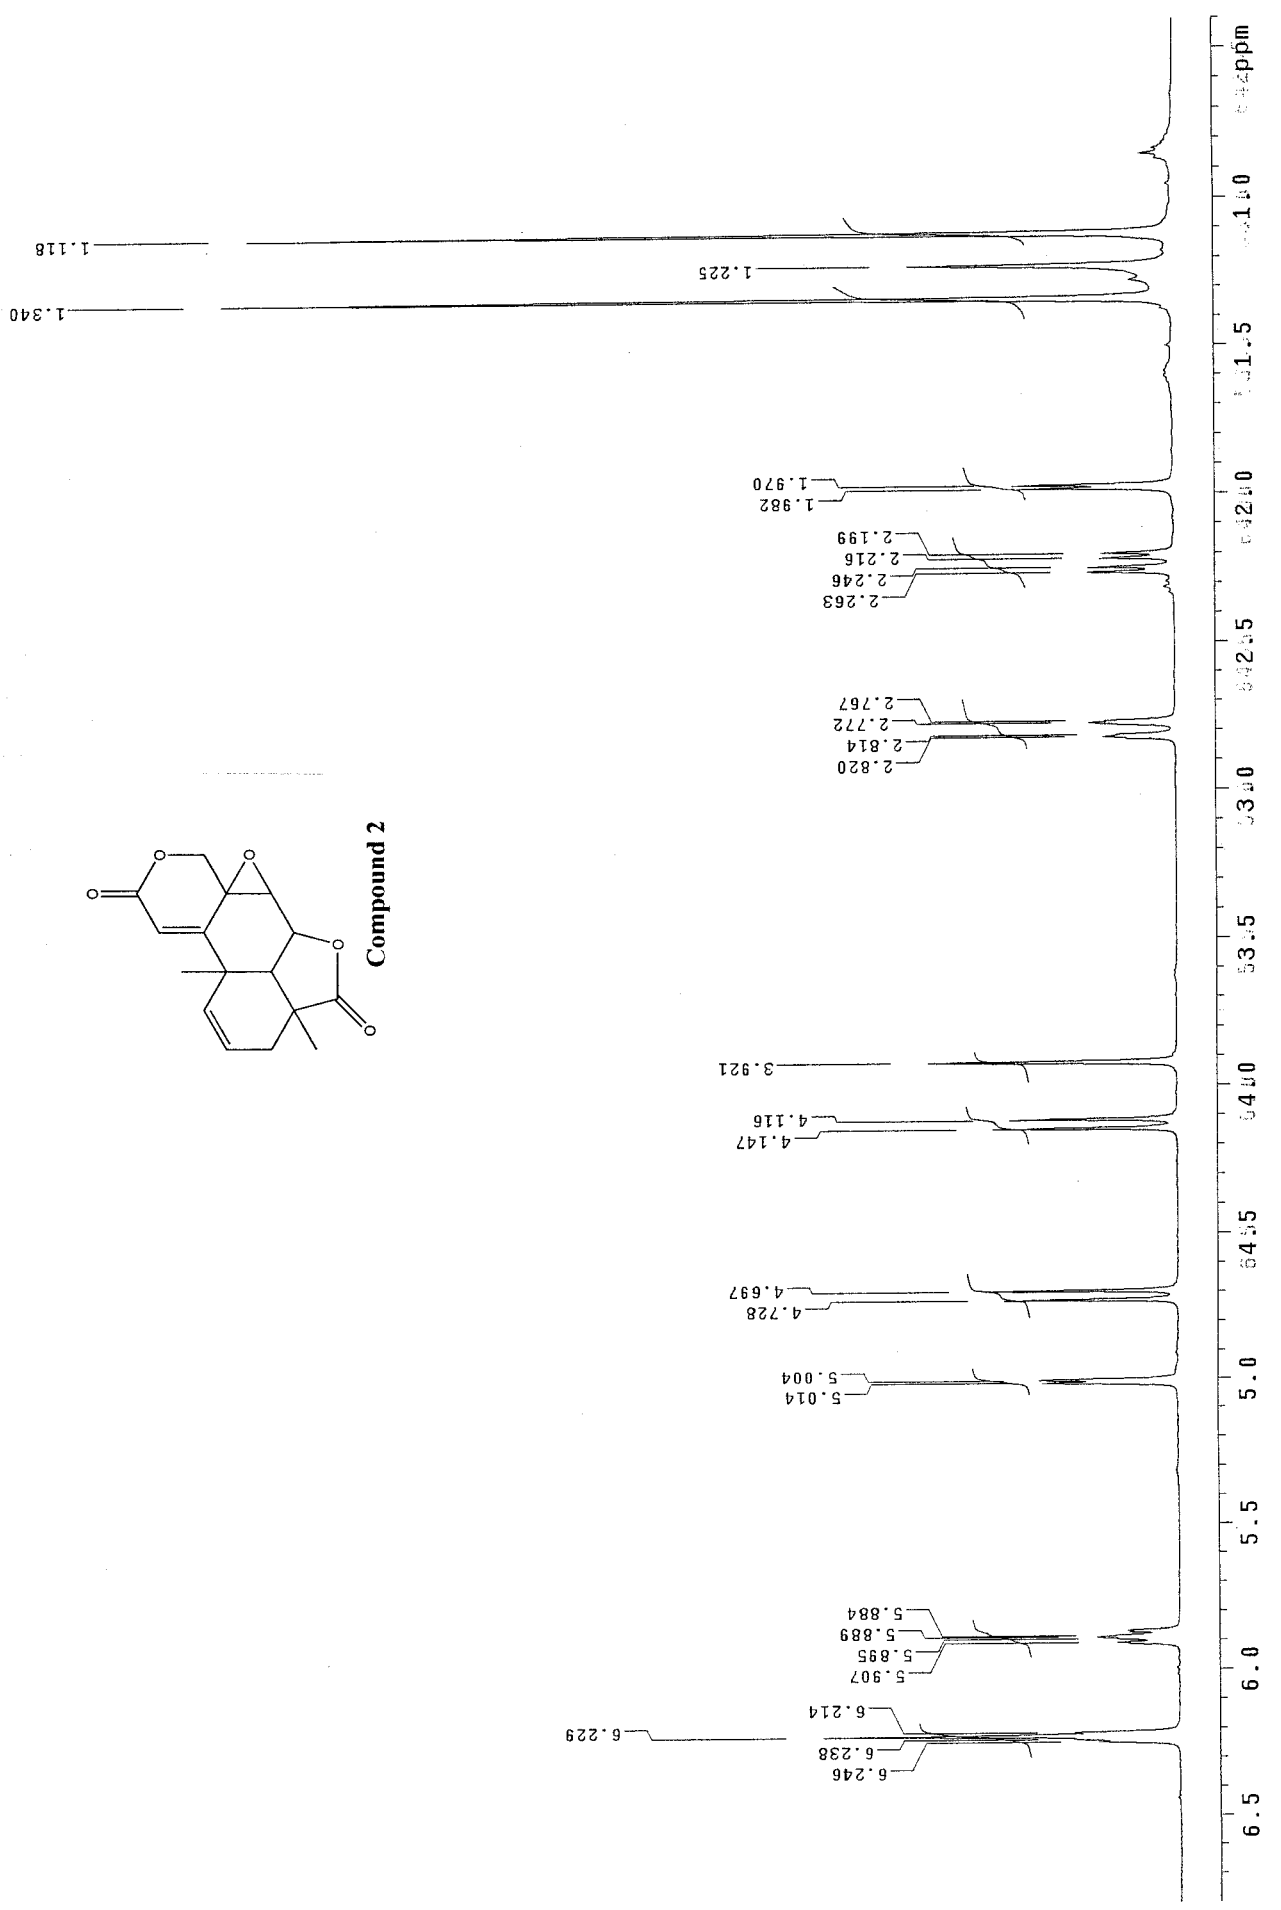

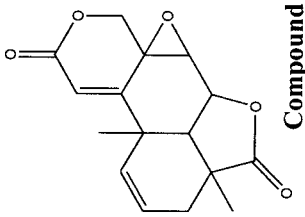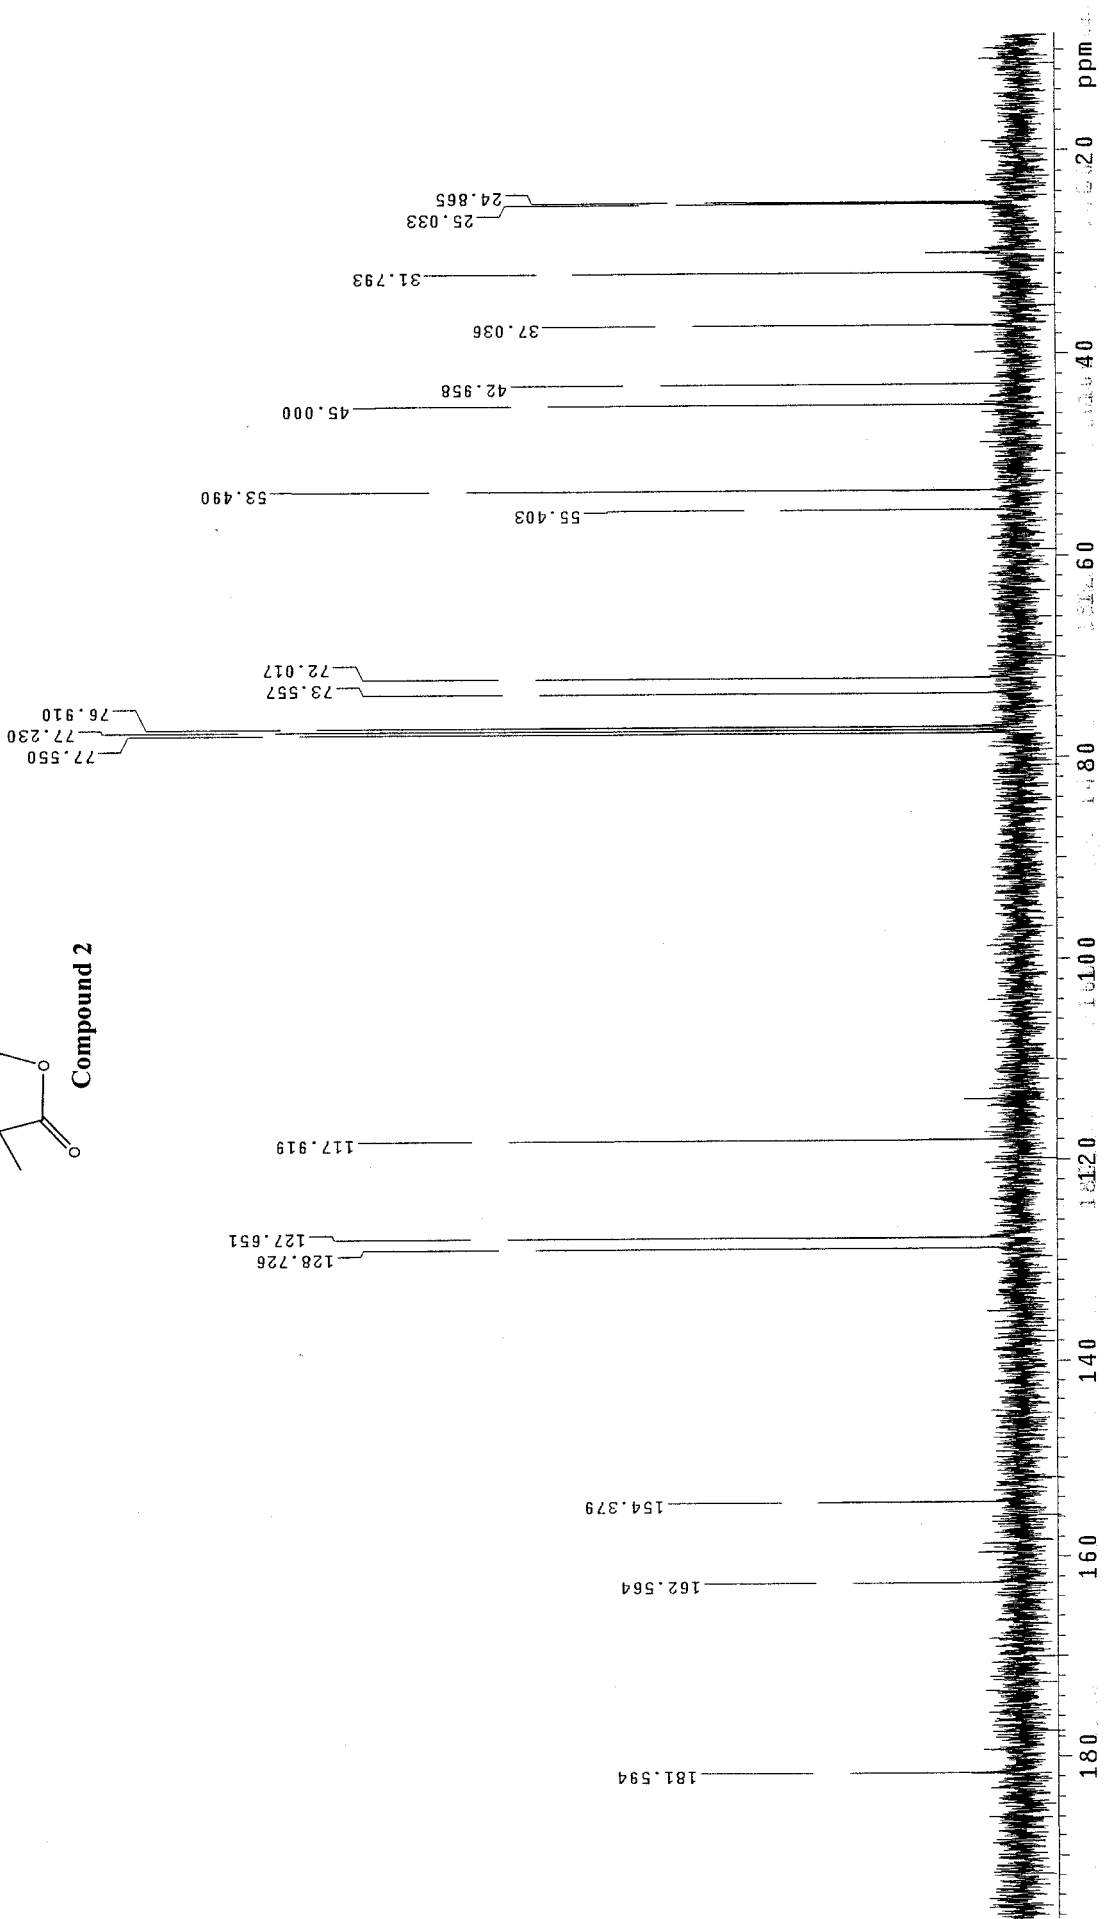

6.5 6.0 5.5 5.0 4.5 4.0 3.5 3.0 2.5 2.0 1.5 1.0 0.5 ppm

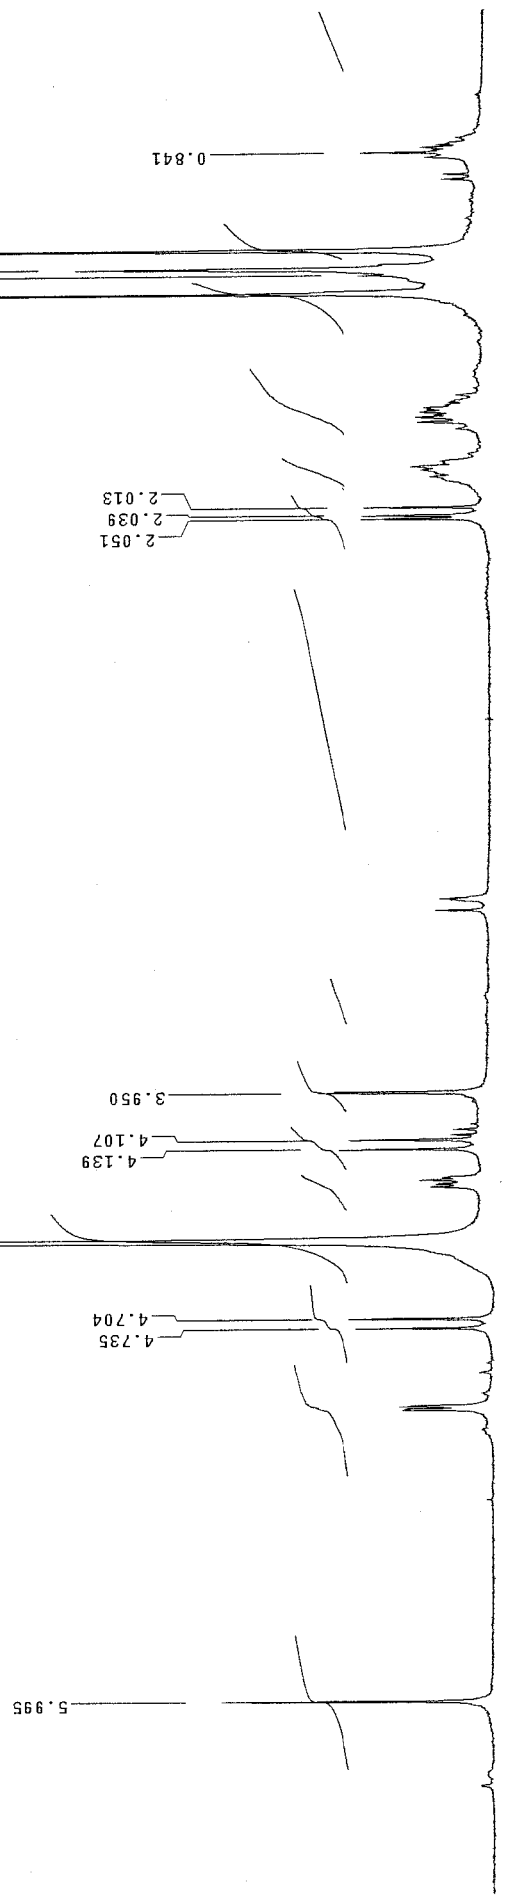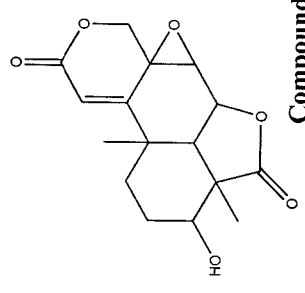

Compound 3

4.443

4.443

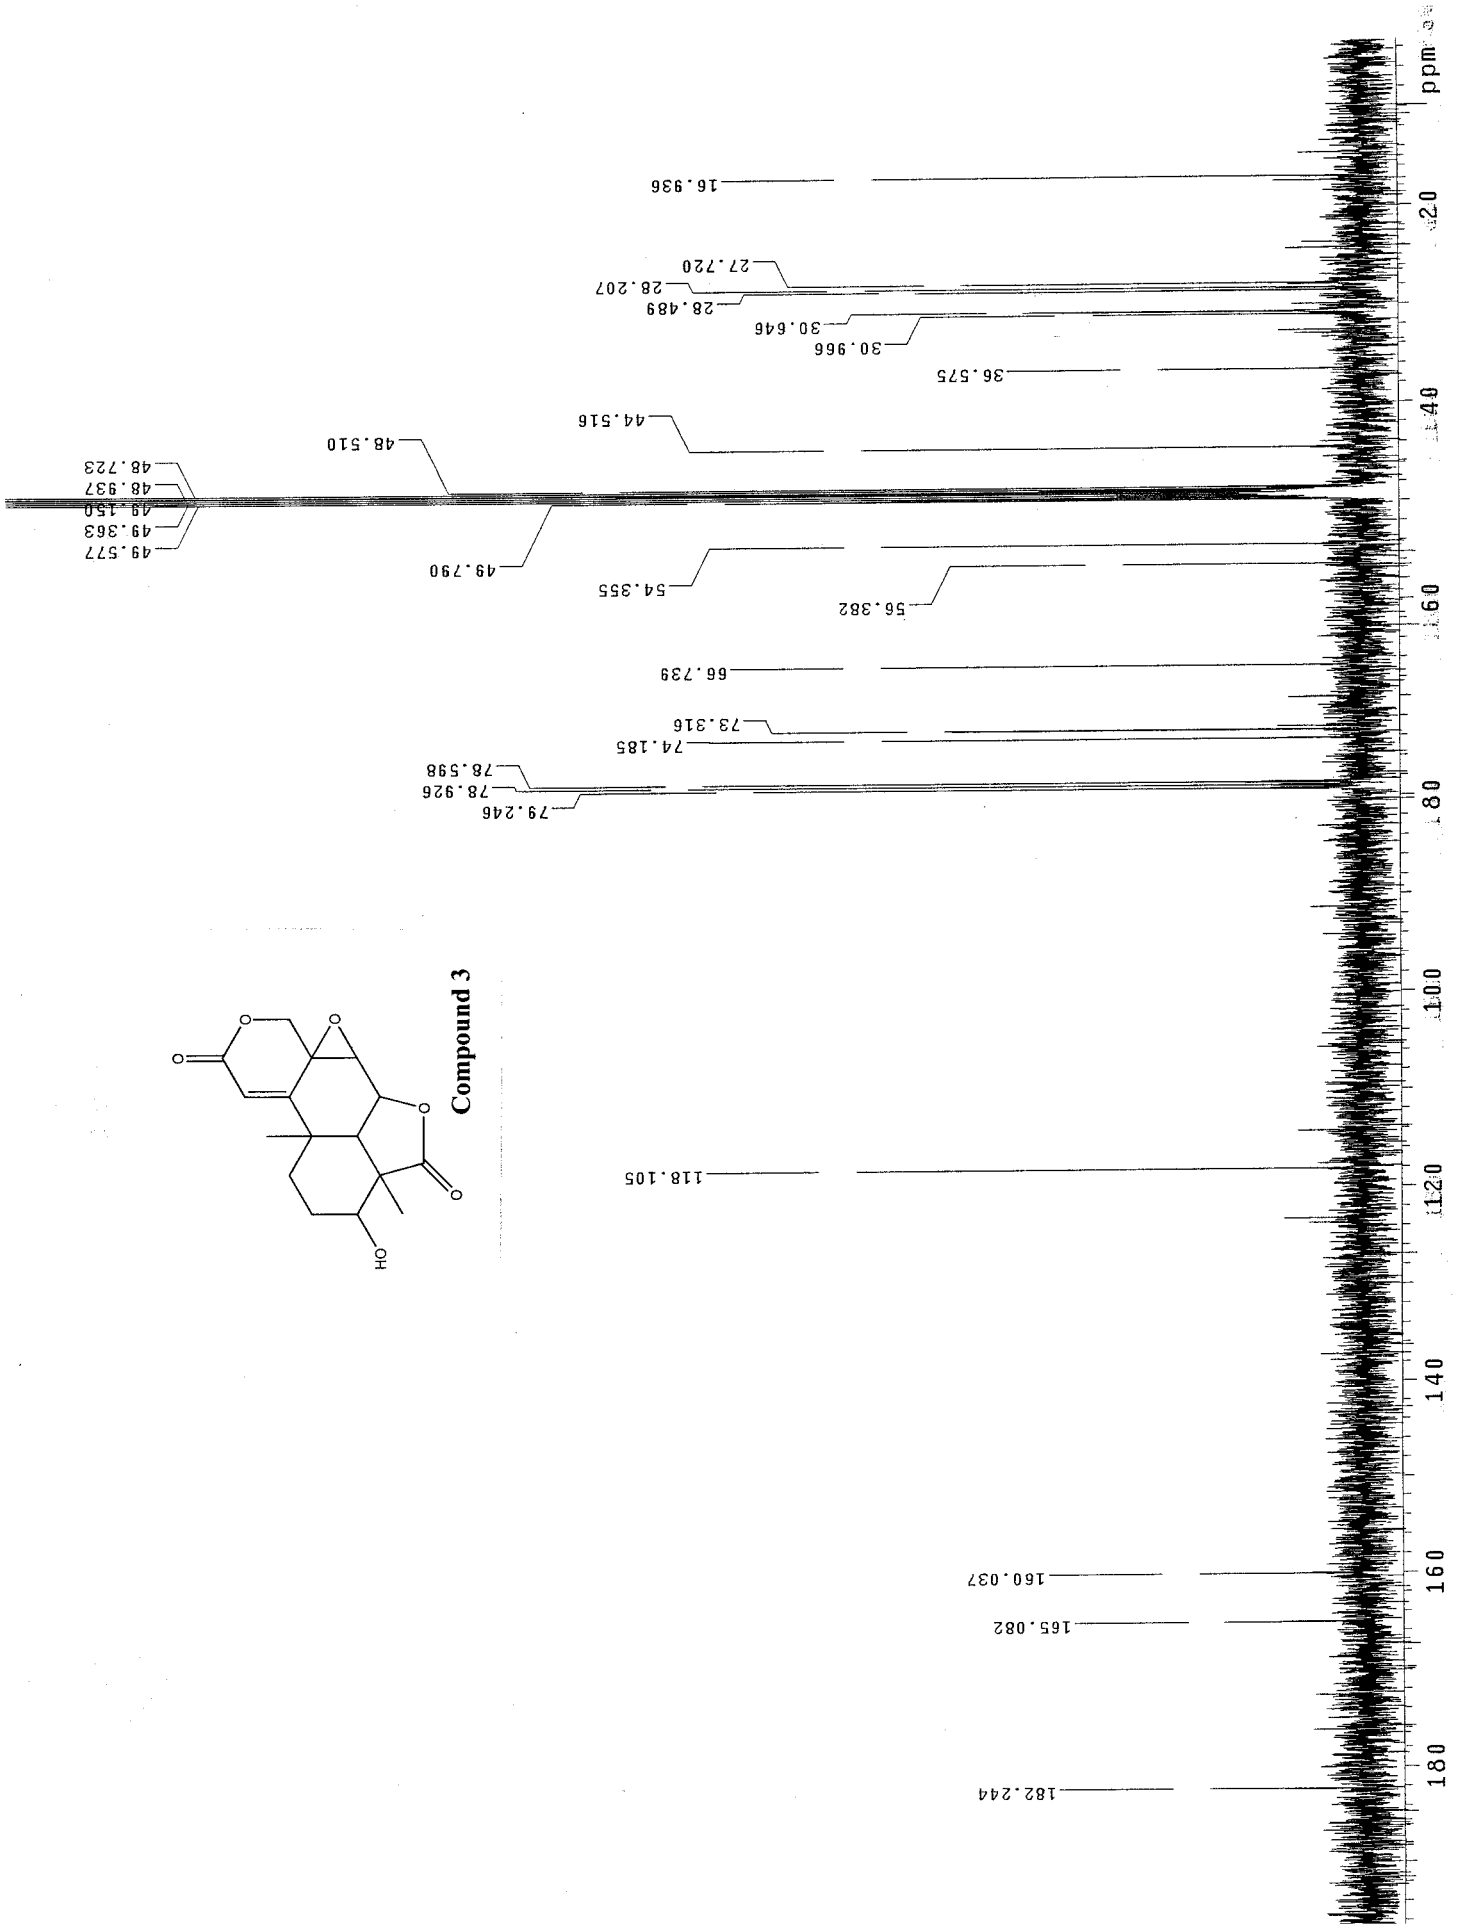

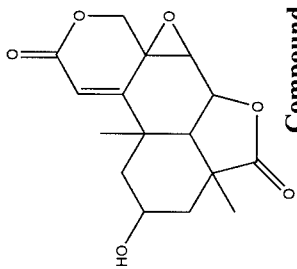

**Compound 4**

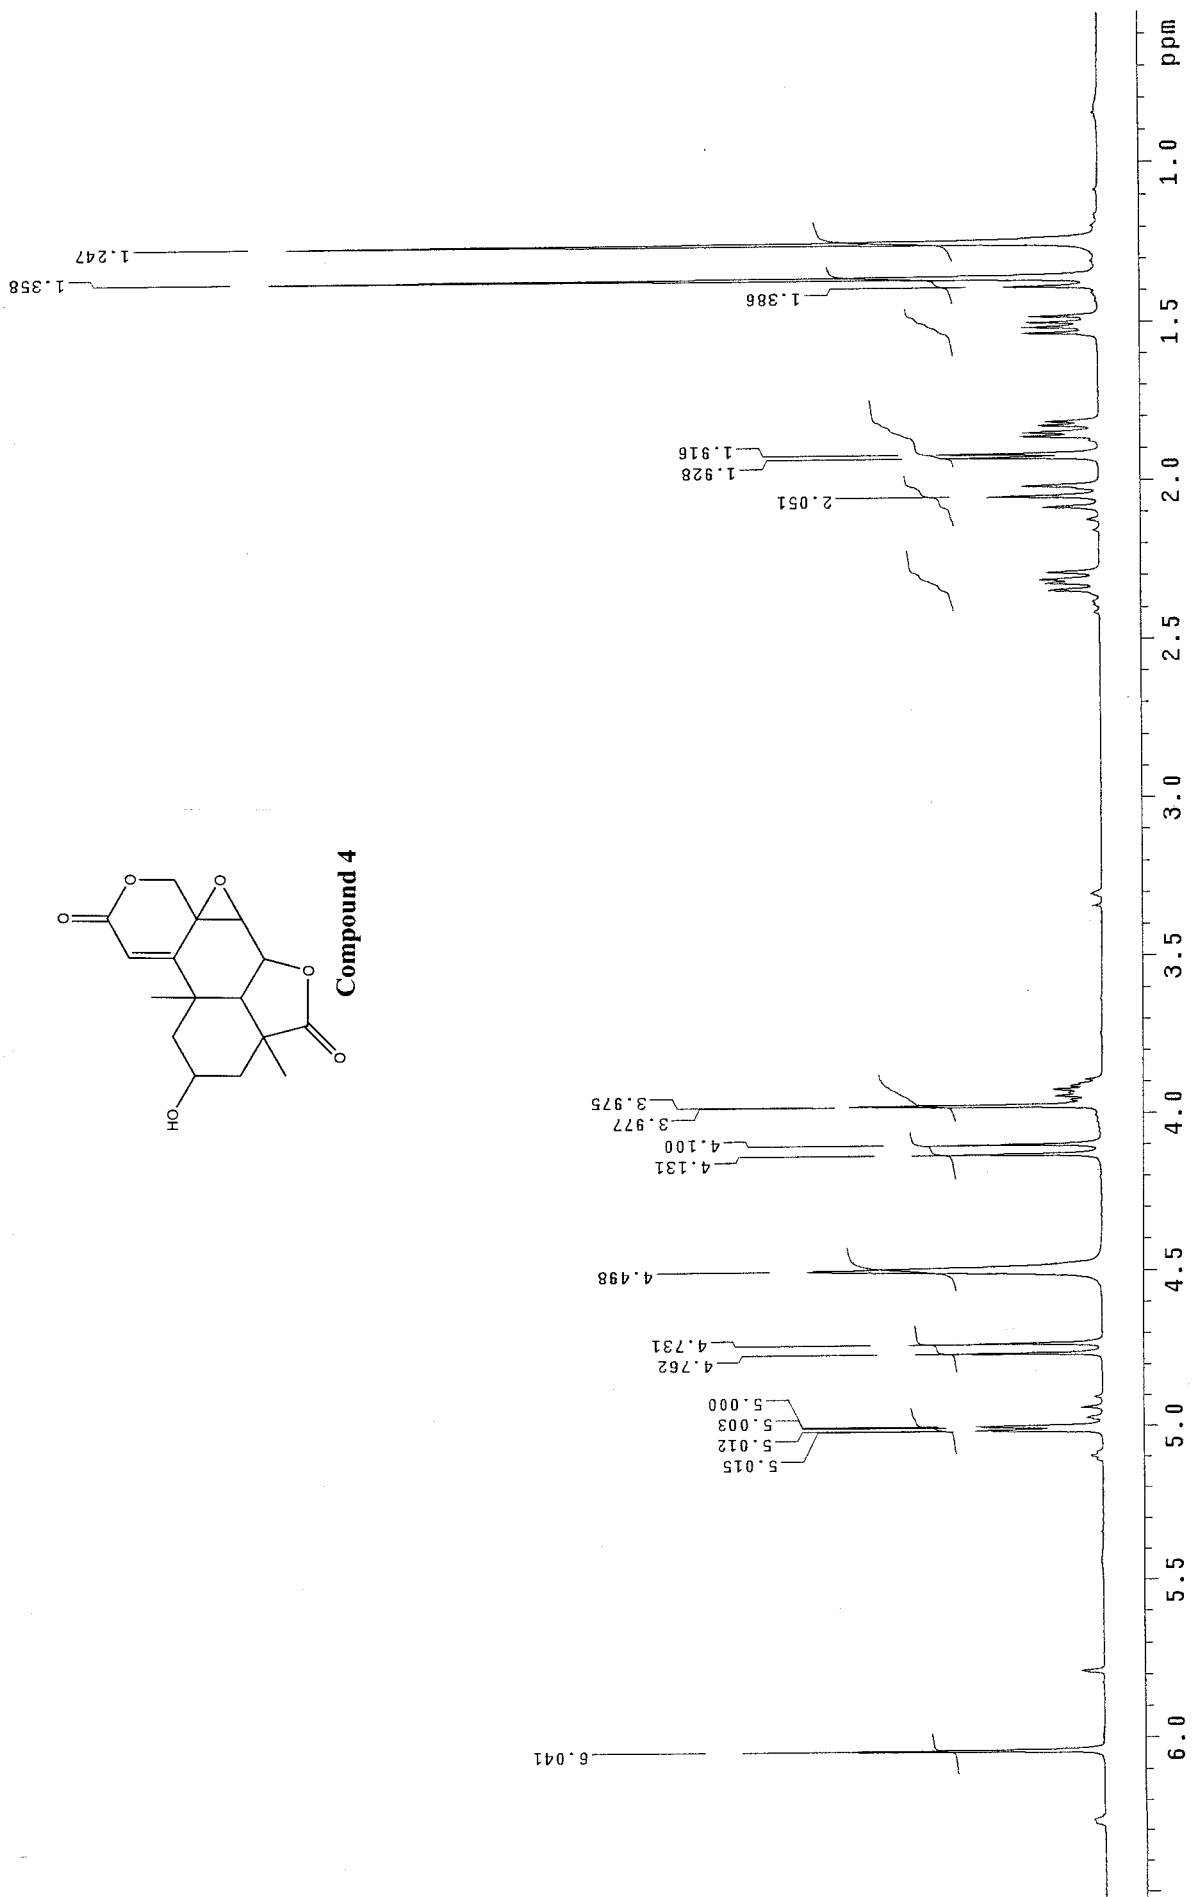



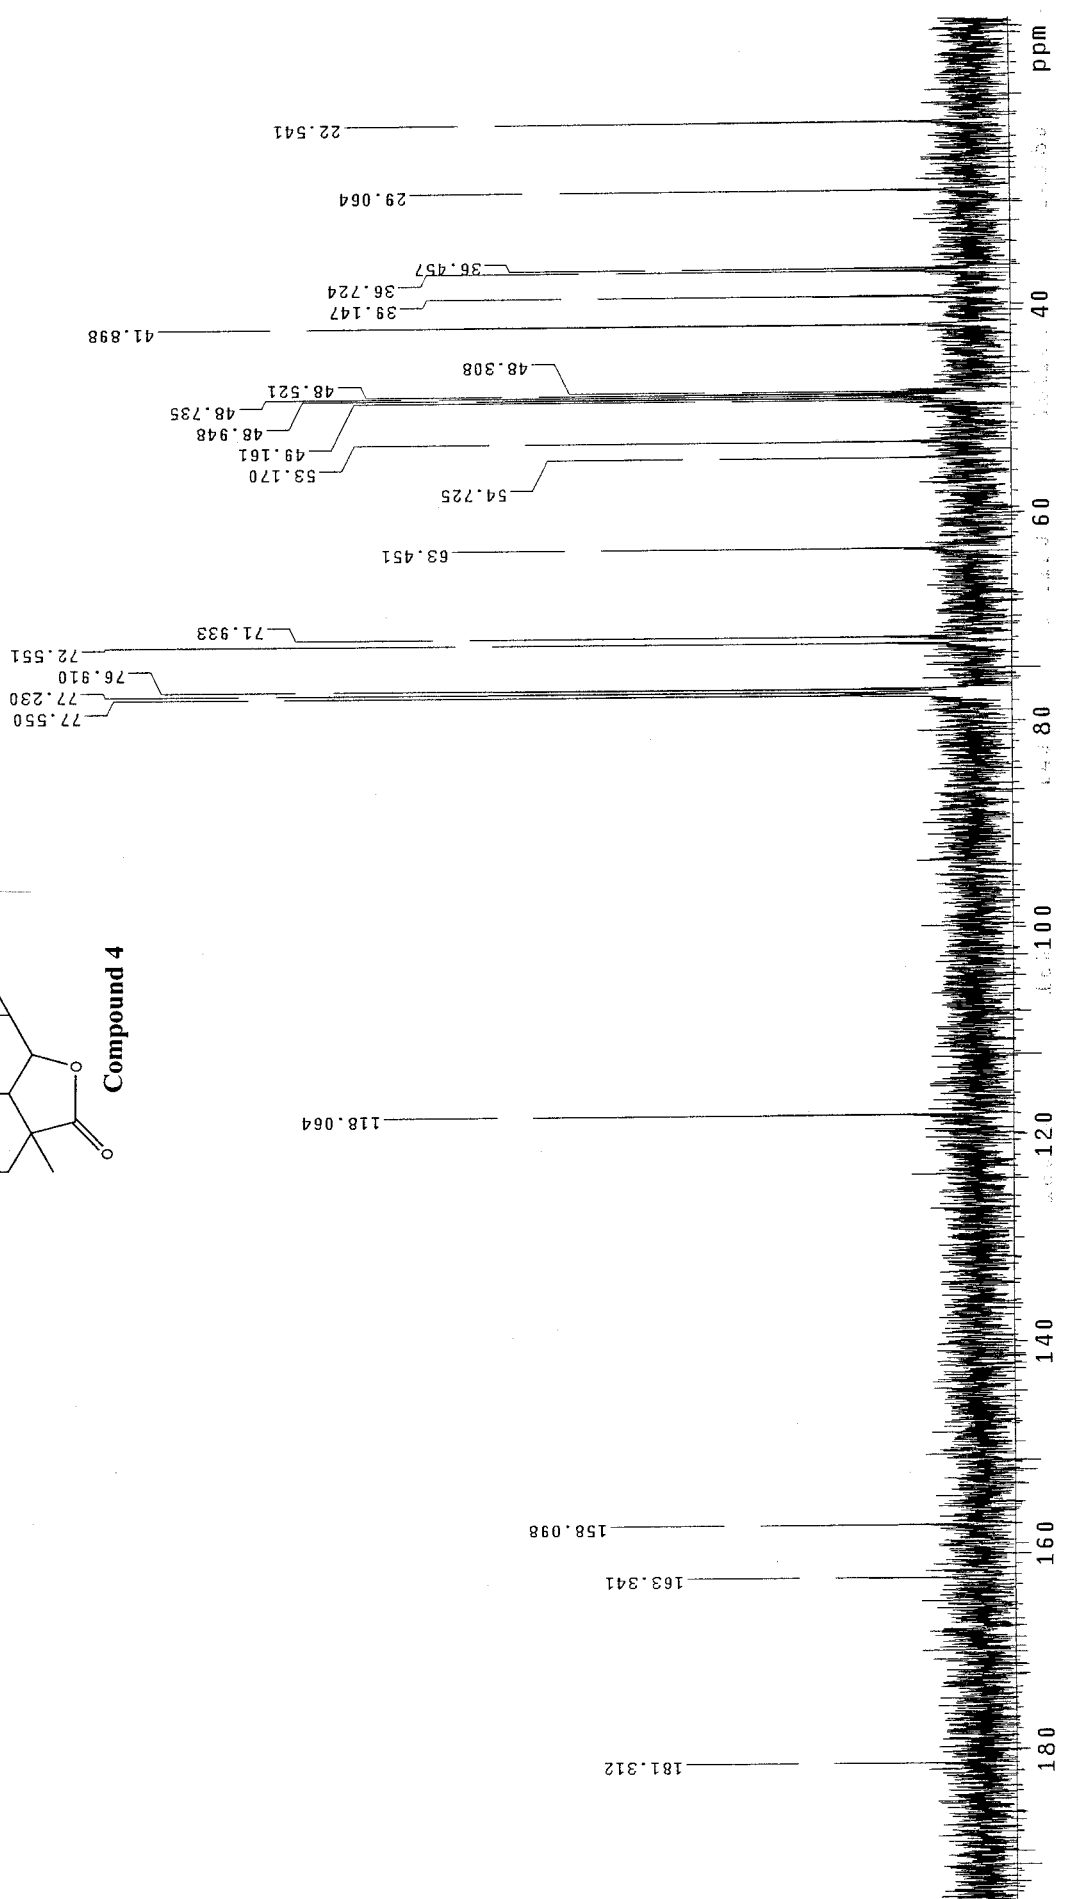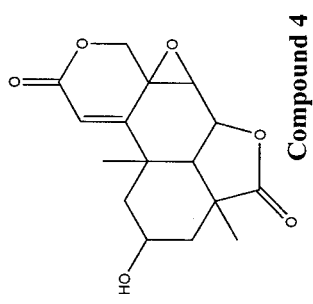

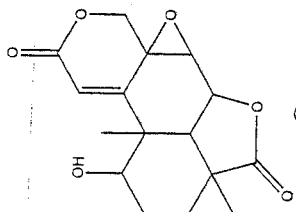

Compound 5

1.283  
1.137

1.815  
1.803

3.887  
3.902  
3.919  
4.047  
4.078

4.673  
4.703

4.951  
4.953  
4.962

6.562

H<sub>2</sub>O

ppm

1

2

3

4

5

6

7

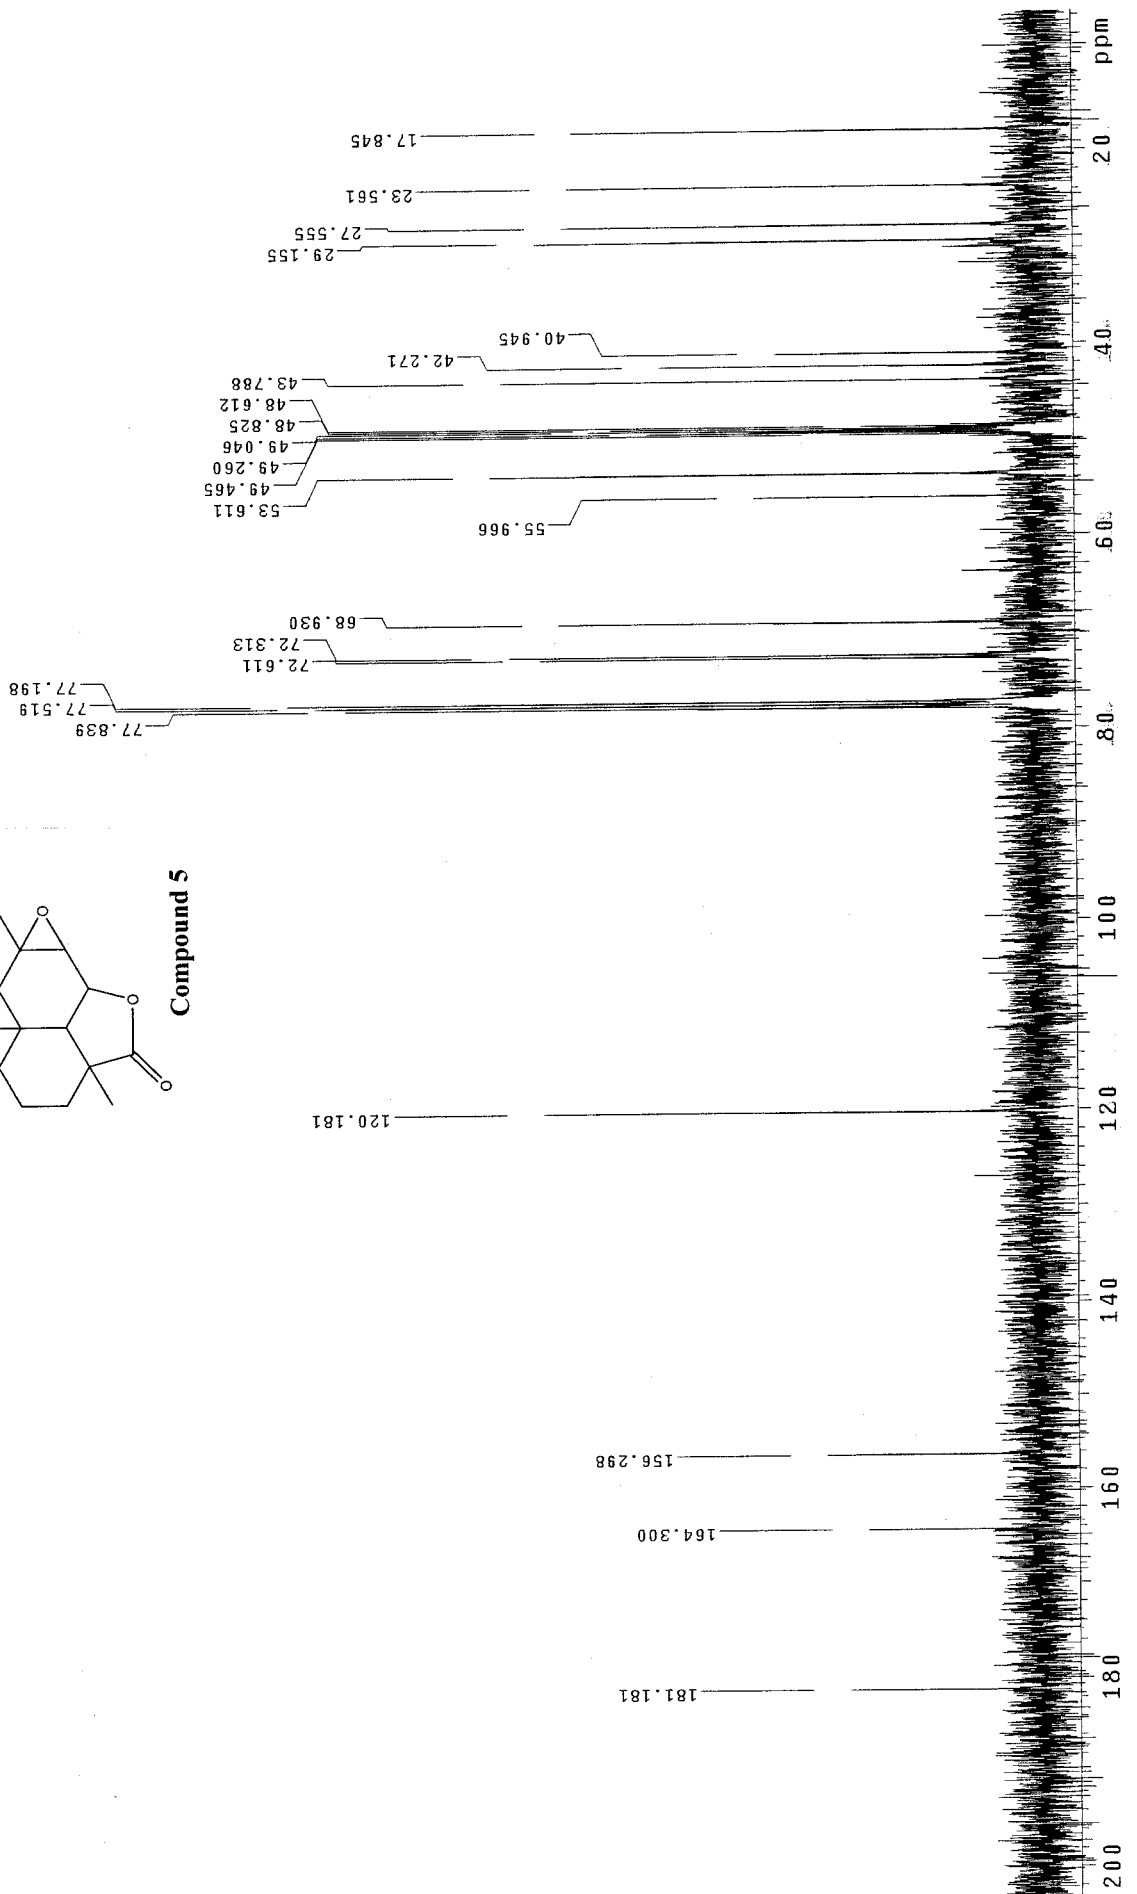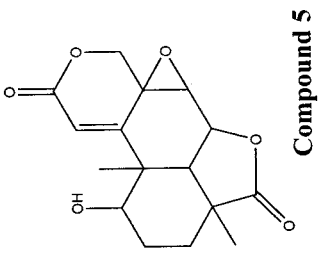

7.0 6.5 6.0 5.5 5.0 4.5 4.0 3.5 3.0 2.5 2.0 1.5 0.0 ppm

1.487  
1.473

1.588

2.301  
2.288

4.022  
4.019

4.429  
4.426  
4.415

4.996  
4.990  
4.923  
4.890  
5.025  
5.020  
5.012

6.068  
6.054  
6.007  
6.003

6.245  
6.239  
6.233  
6.093  
6.079

6.627  
6.603

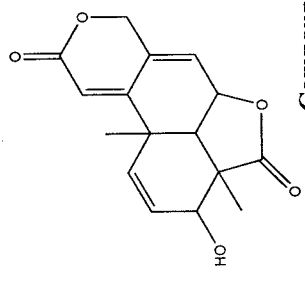

Compound 6

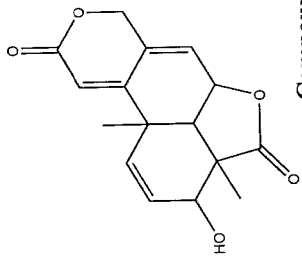

Compound 9

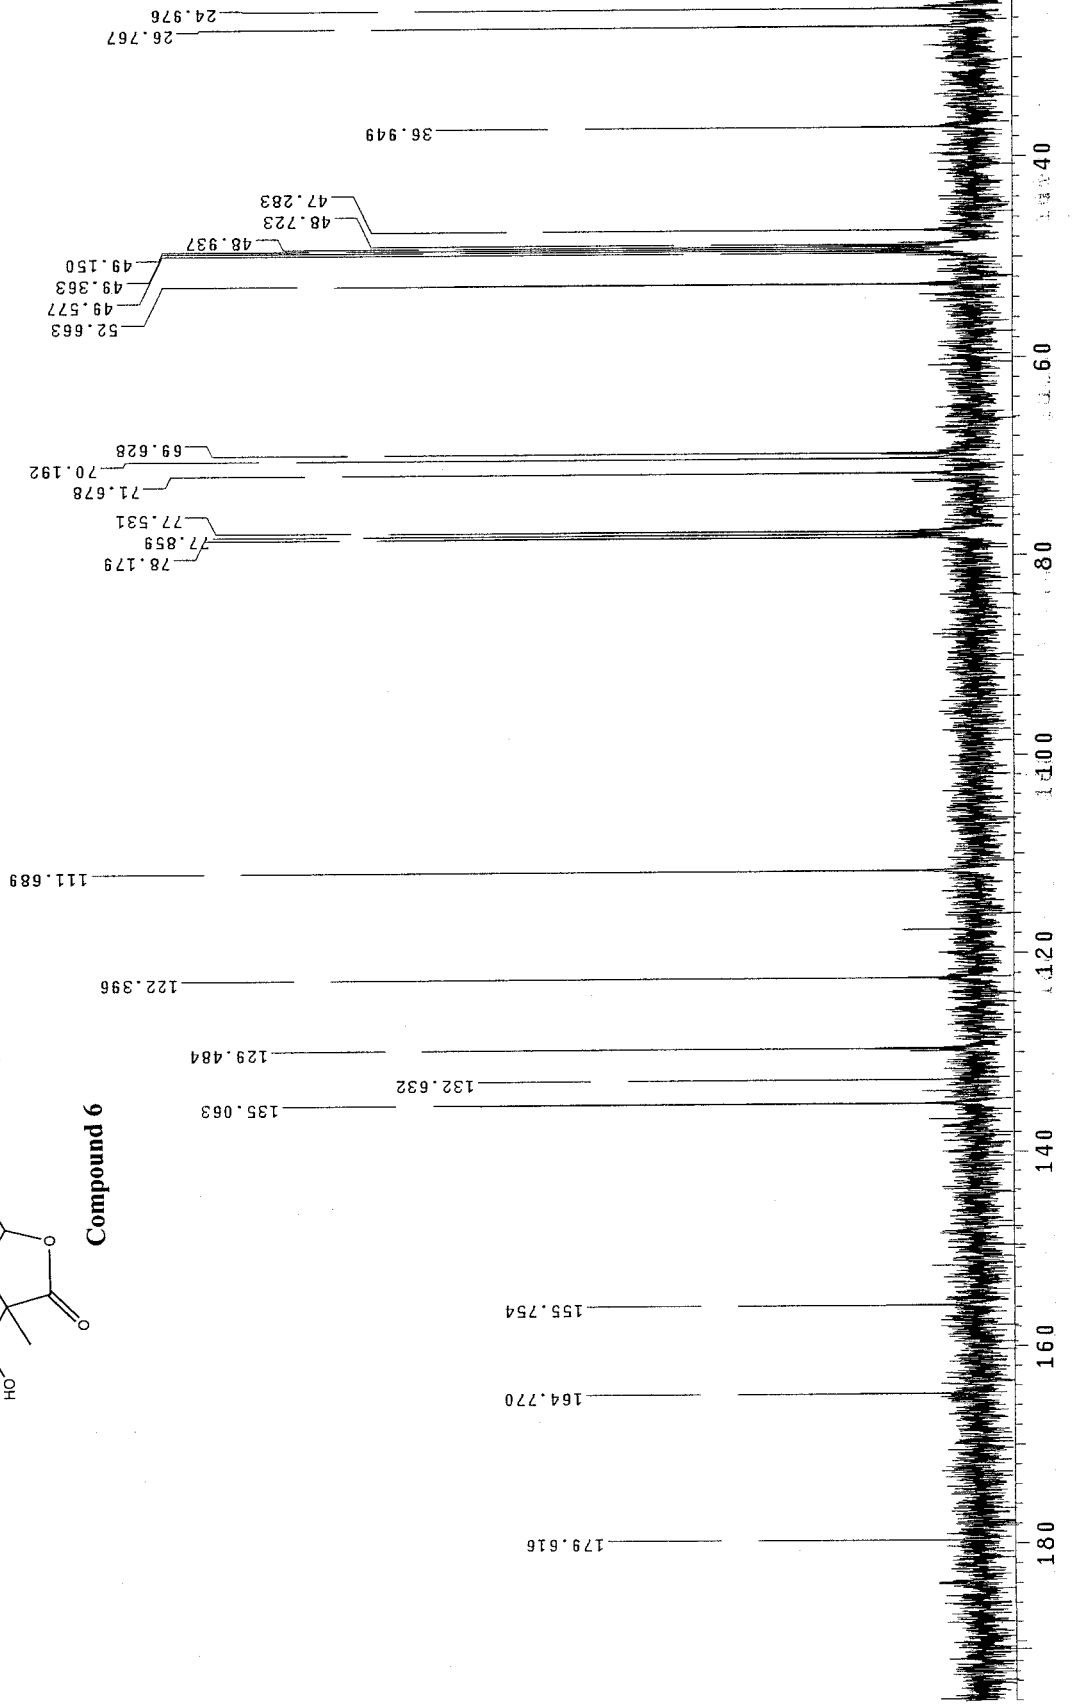

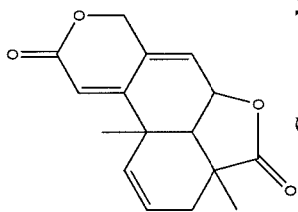

Compound 7

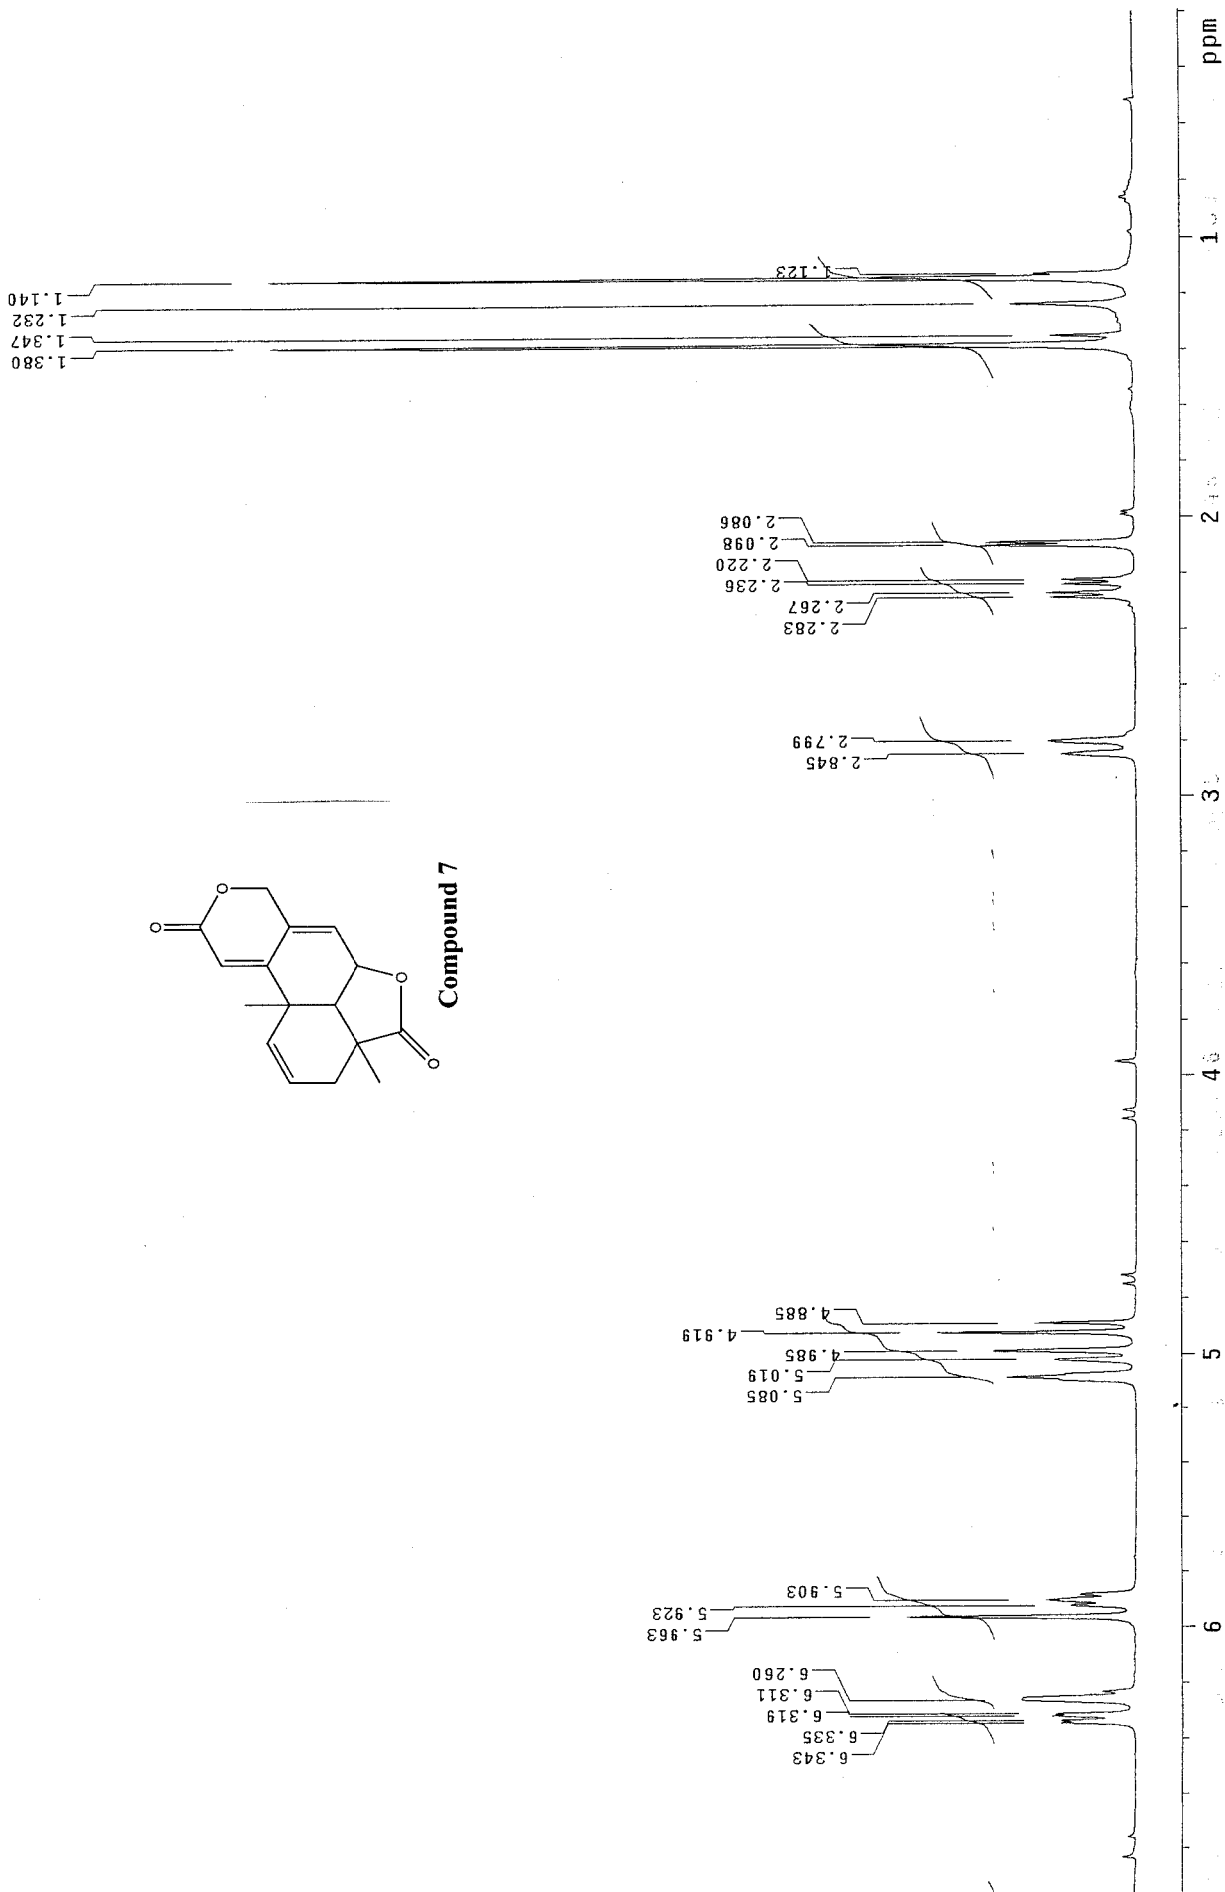

13C OBSERVE

Archive directory: /export/home/herath/vnmr/sys/data  
Sample directory: TH5-45-2A  
File: CARBON

Pulse Sequence: s2pul

Solvent: CDCl3  
Temp. 30.0 C / 303.1 K  
Mercury-400BB "unknown"

Relax. delay 2.000 sec  
Pulse 45.0 degrees  
Acq. time 1.199 sec  
Width 25125.6 Hz  
576 repetitions  
OBSERVE C13, 100.6115534 MHZ  
DECUPLE H1, 400.1272240 MHZ  
Power 36 dB  
continuously on  
WALTZ-16 modulated  
DATA PROCESSING  
Line broadening 1.0 Hz  
FT size 65536  
Total time 54 min, 50 sec

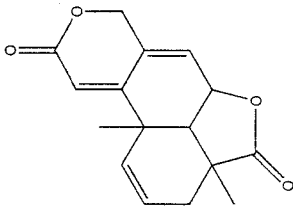

Compound 7

181.906  
163.585  
155.103

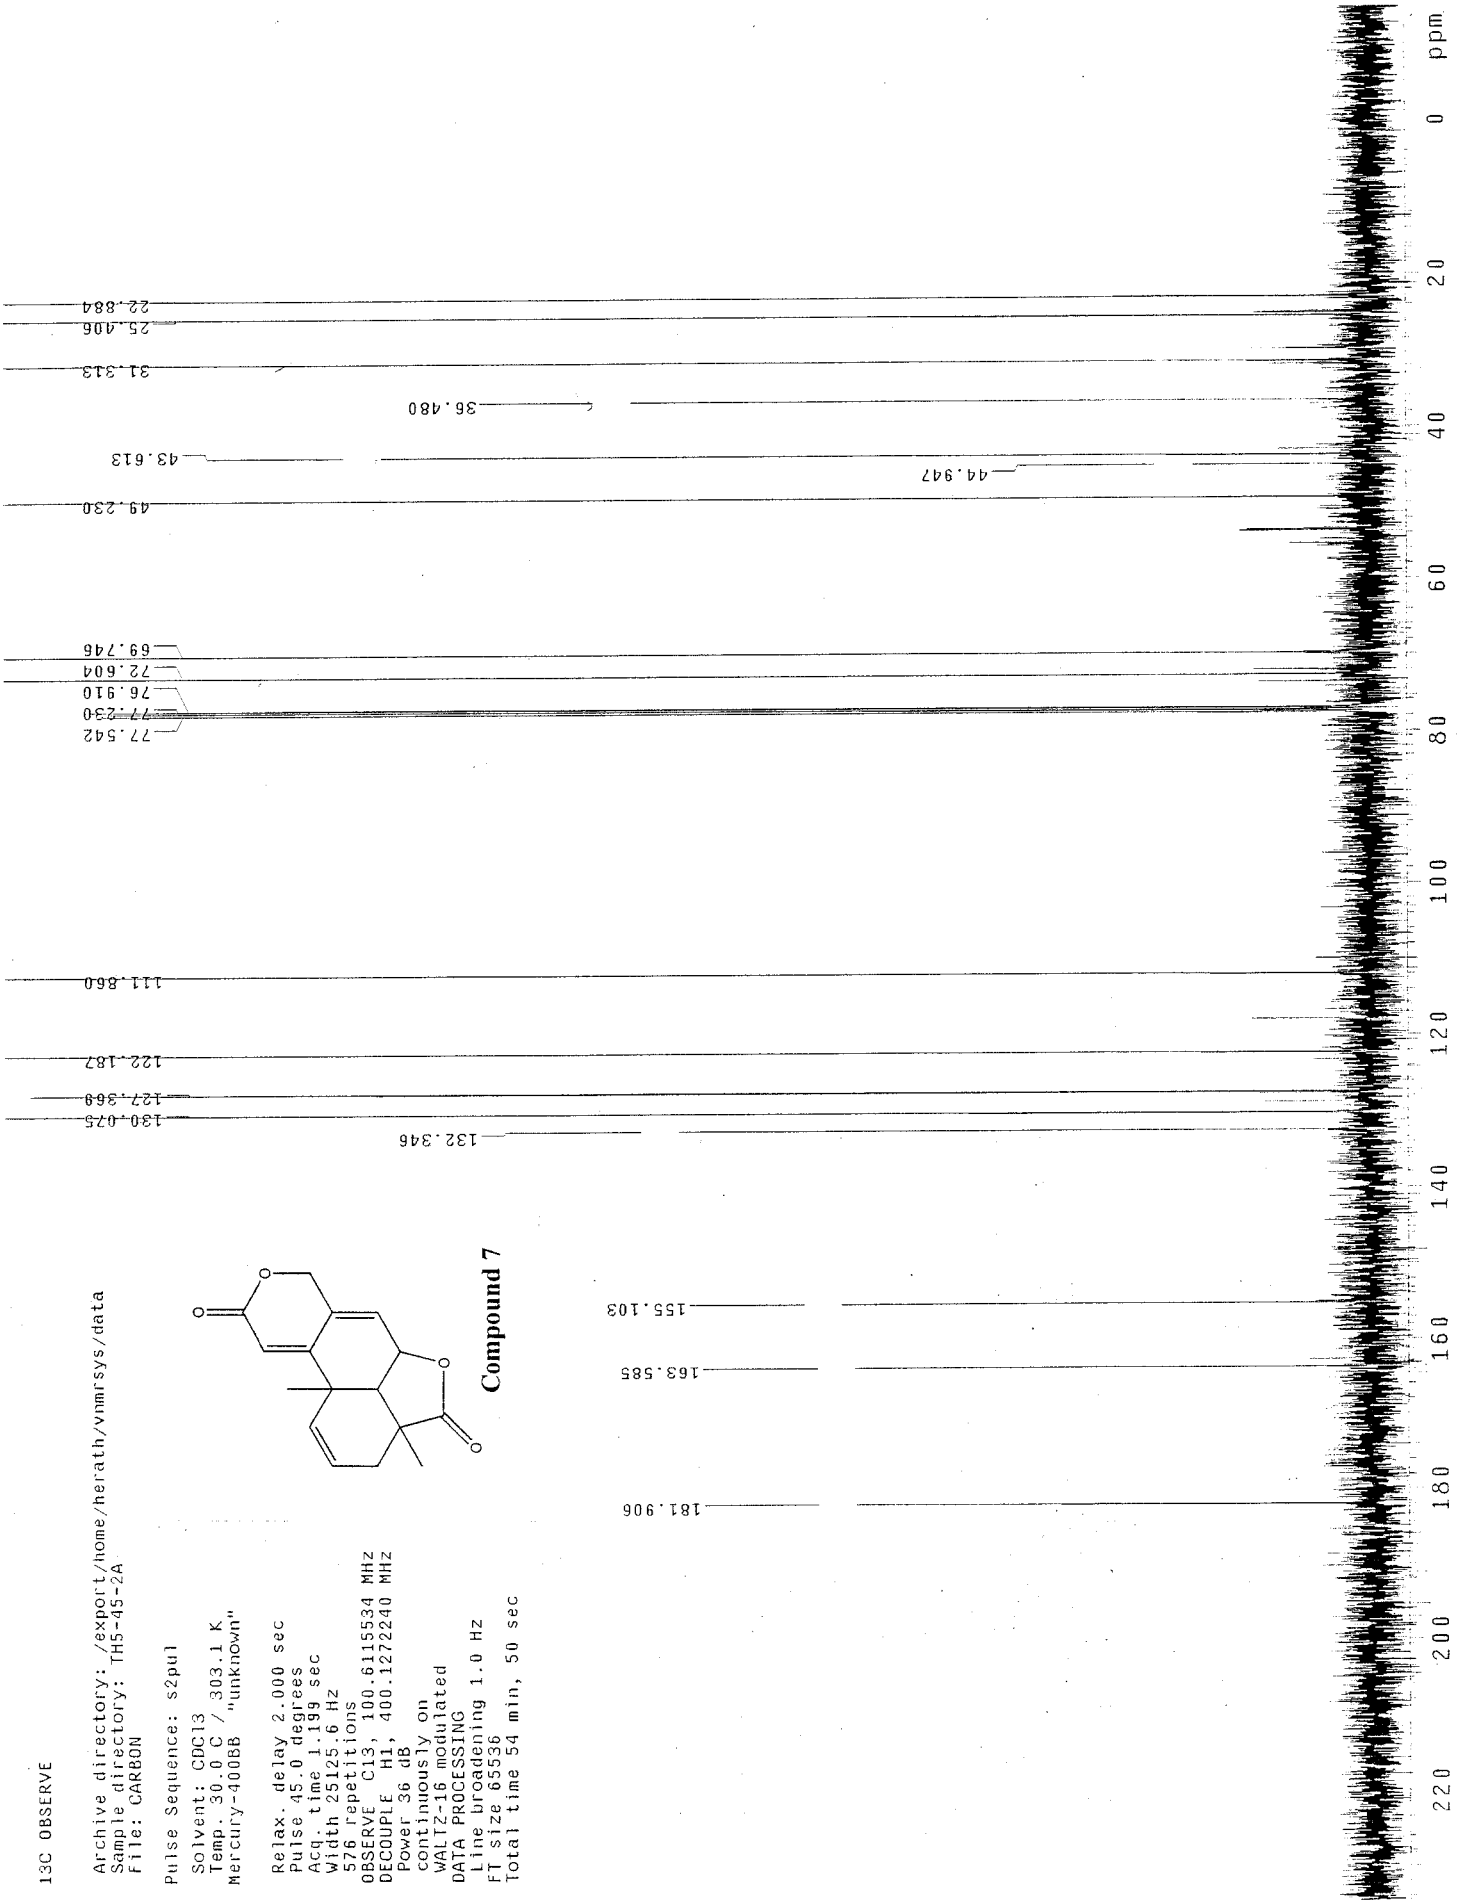

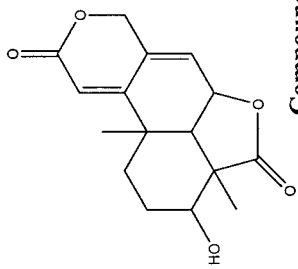

Compound 8

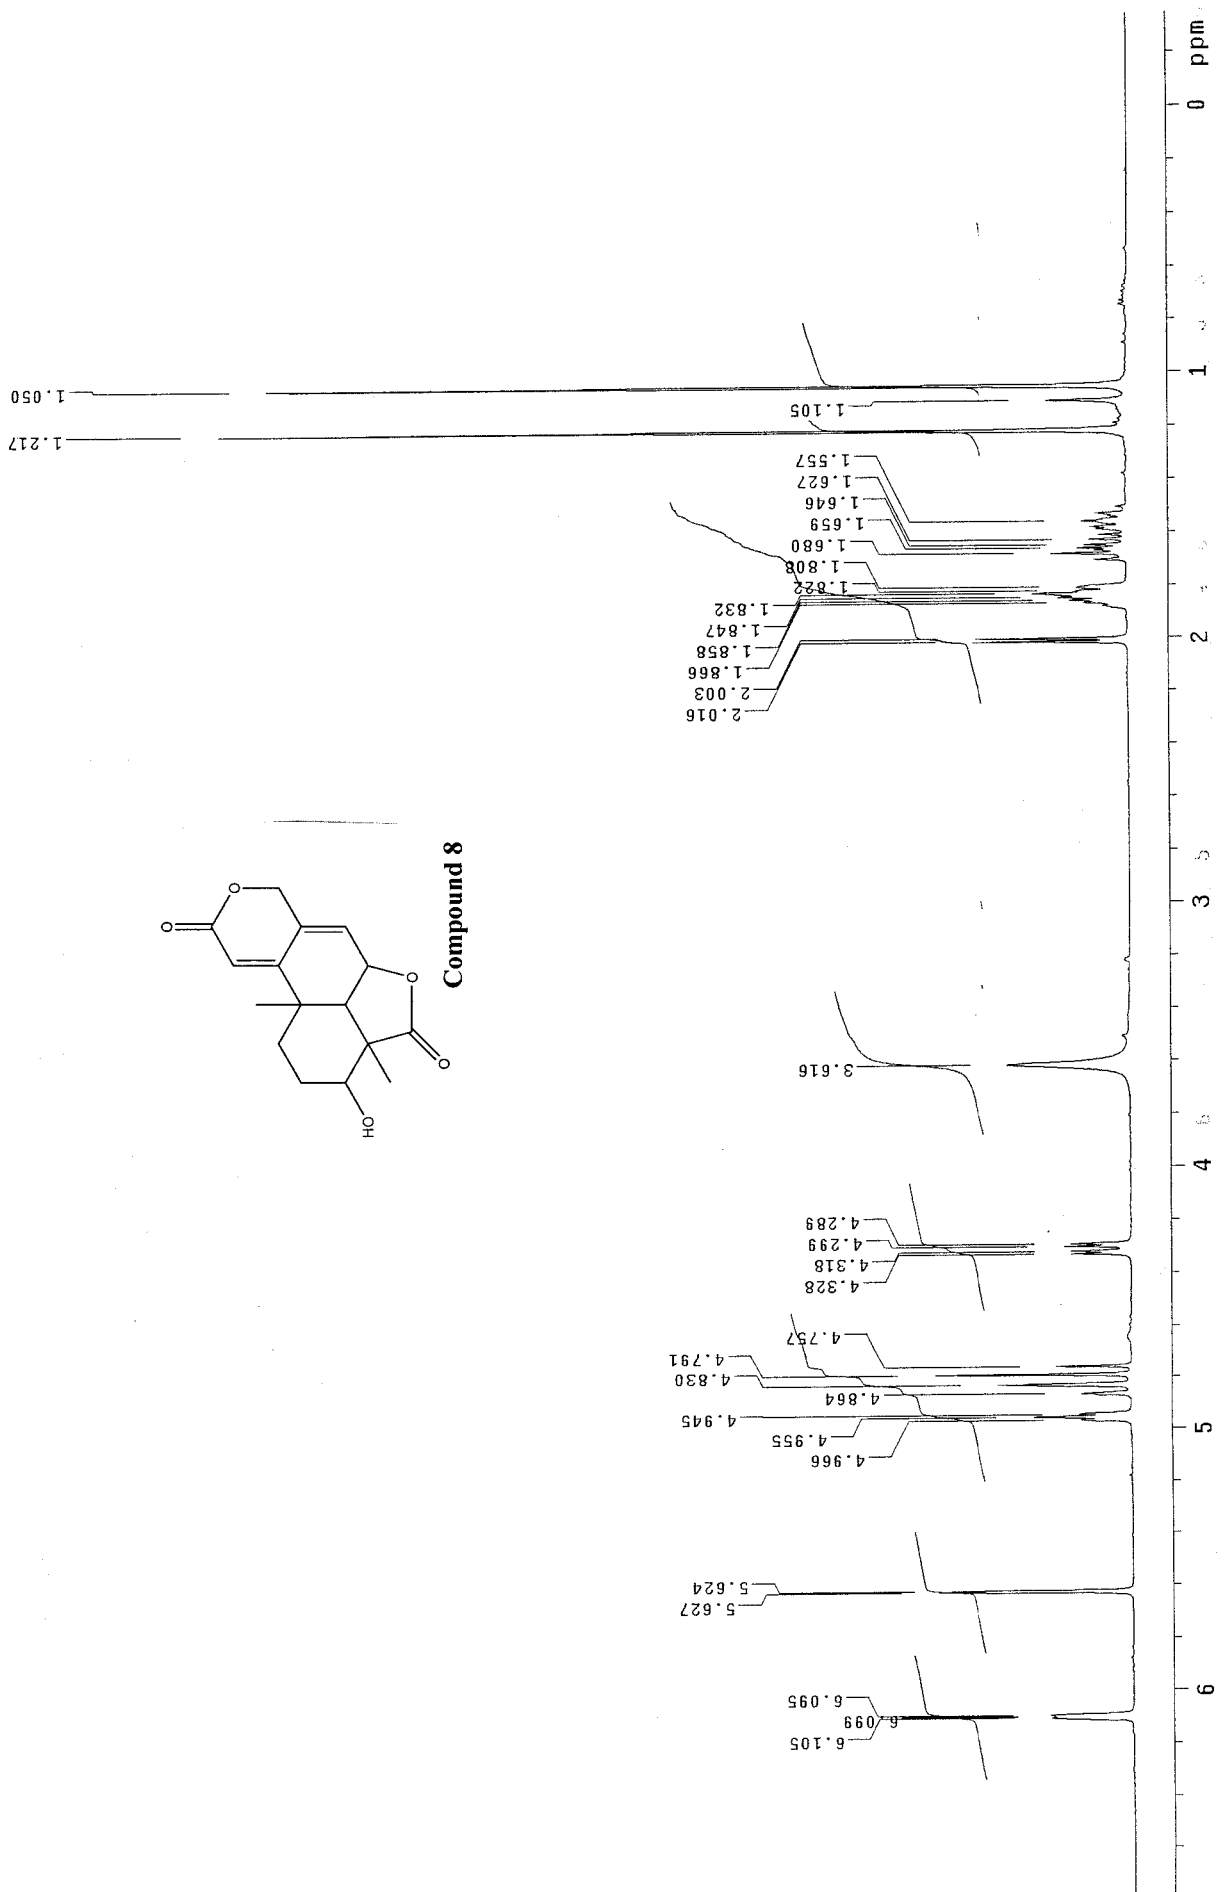



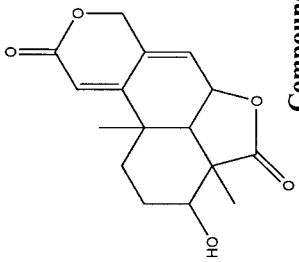

Compound 8

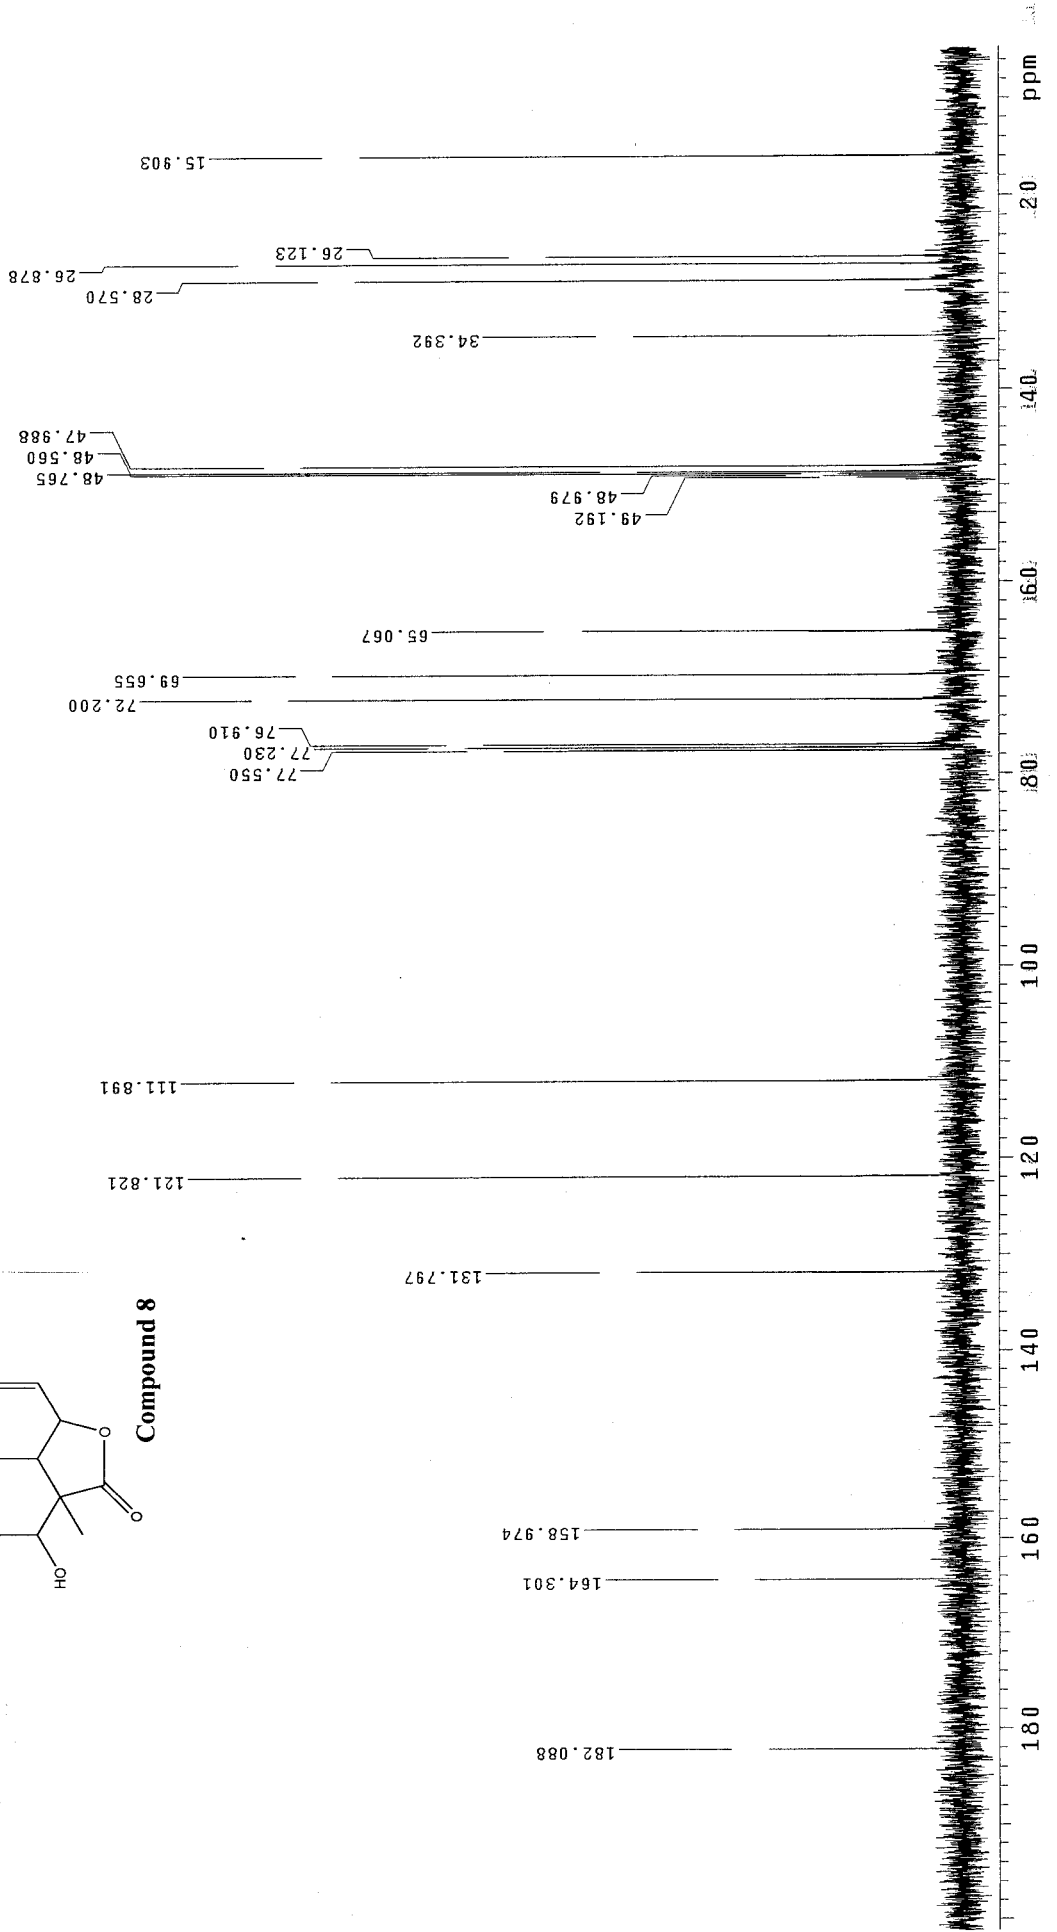

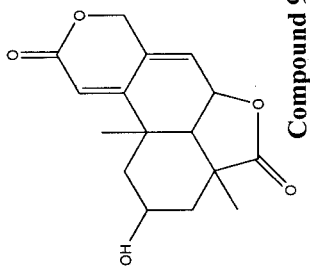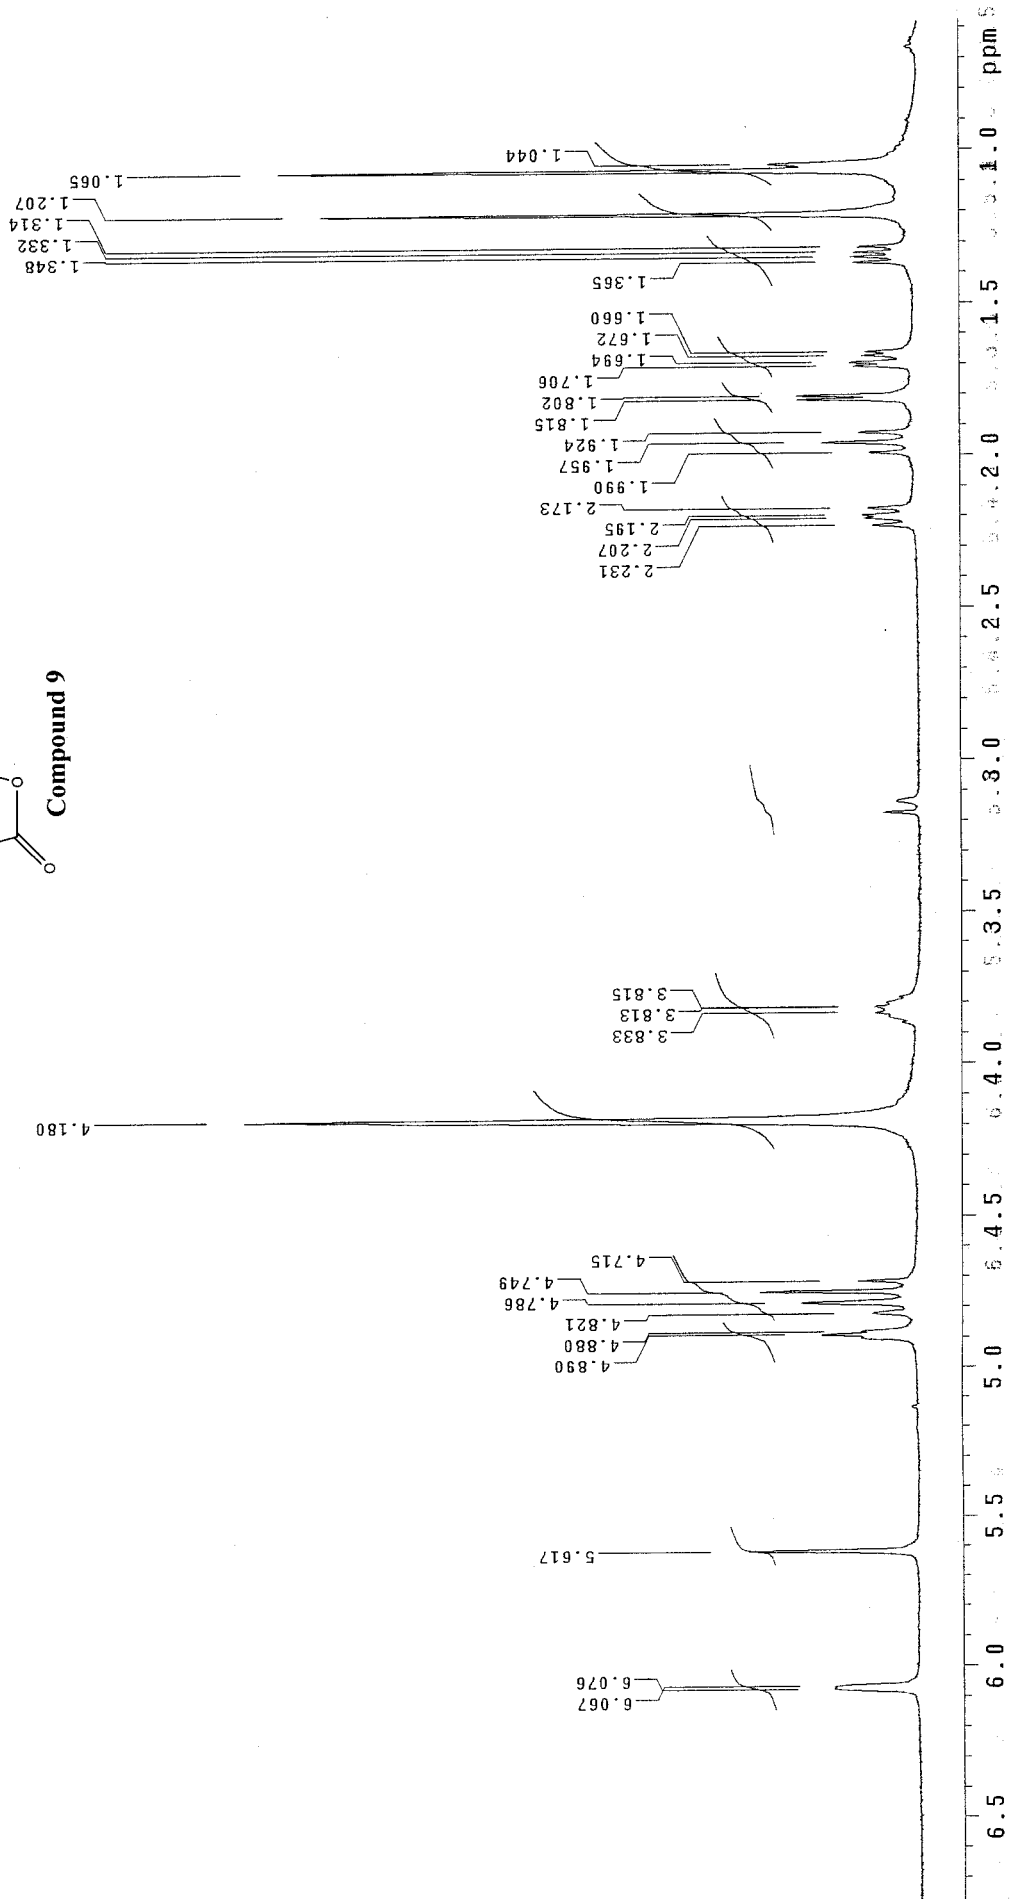

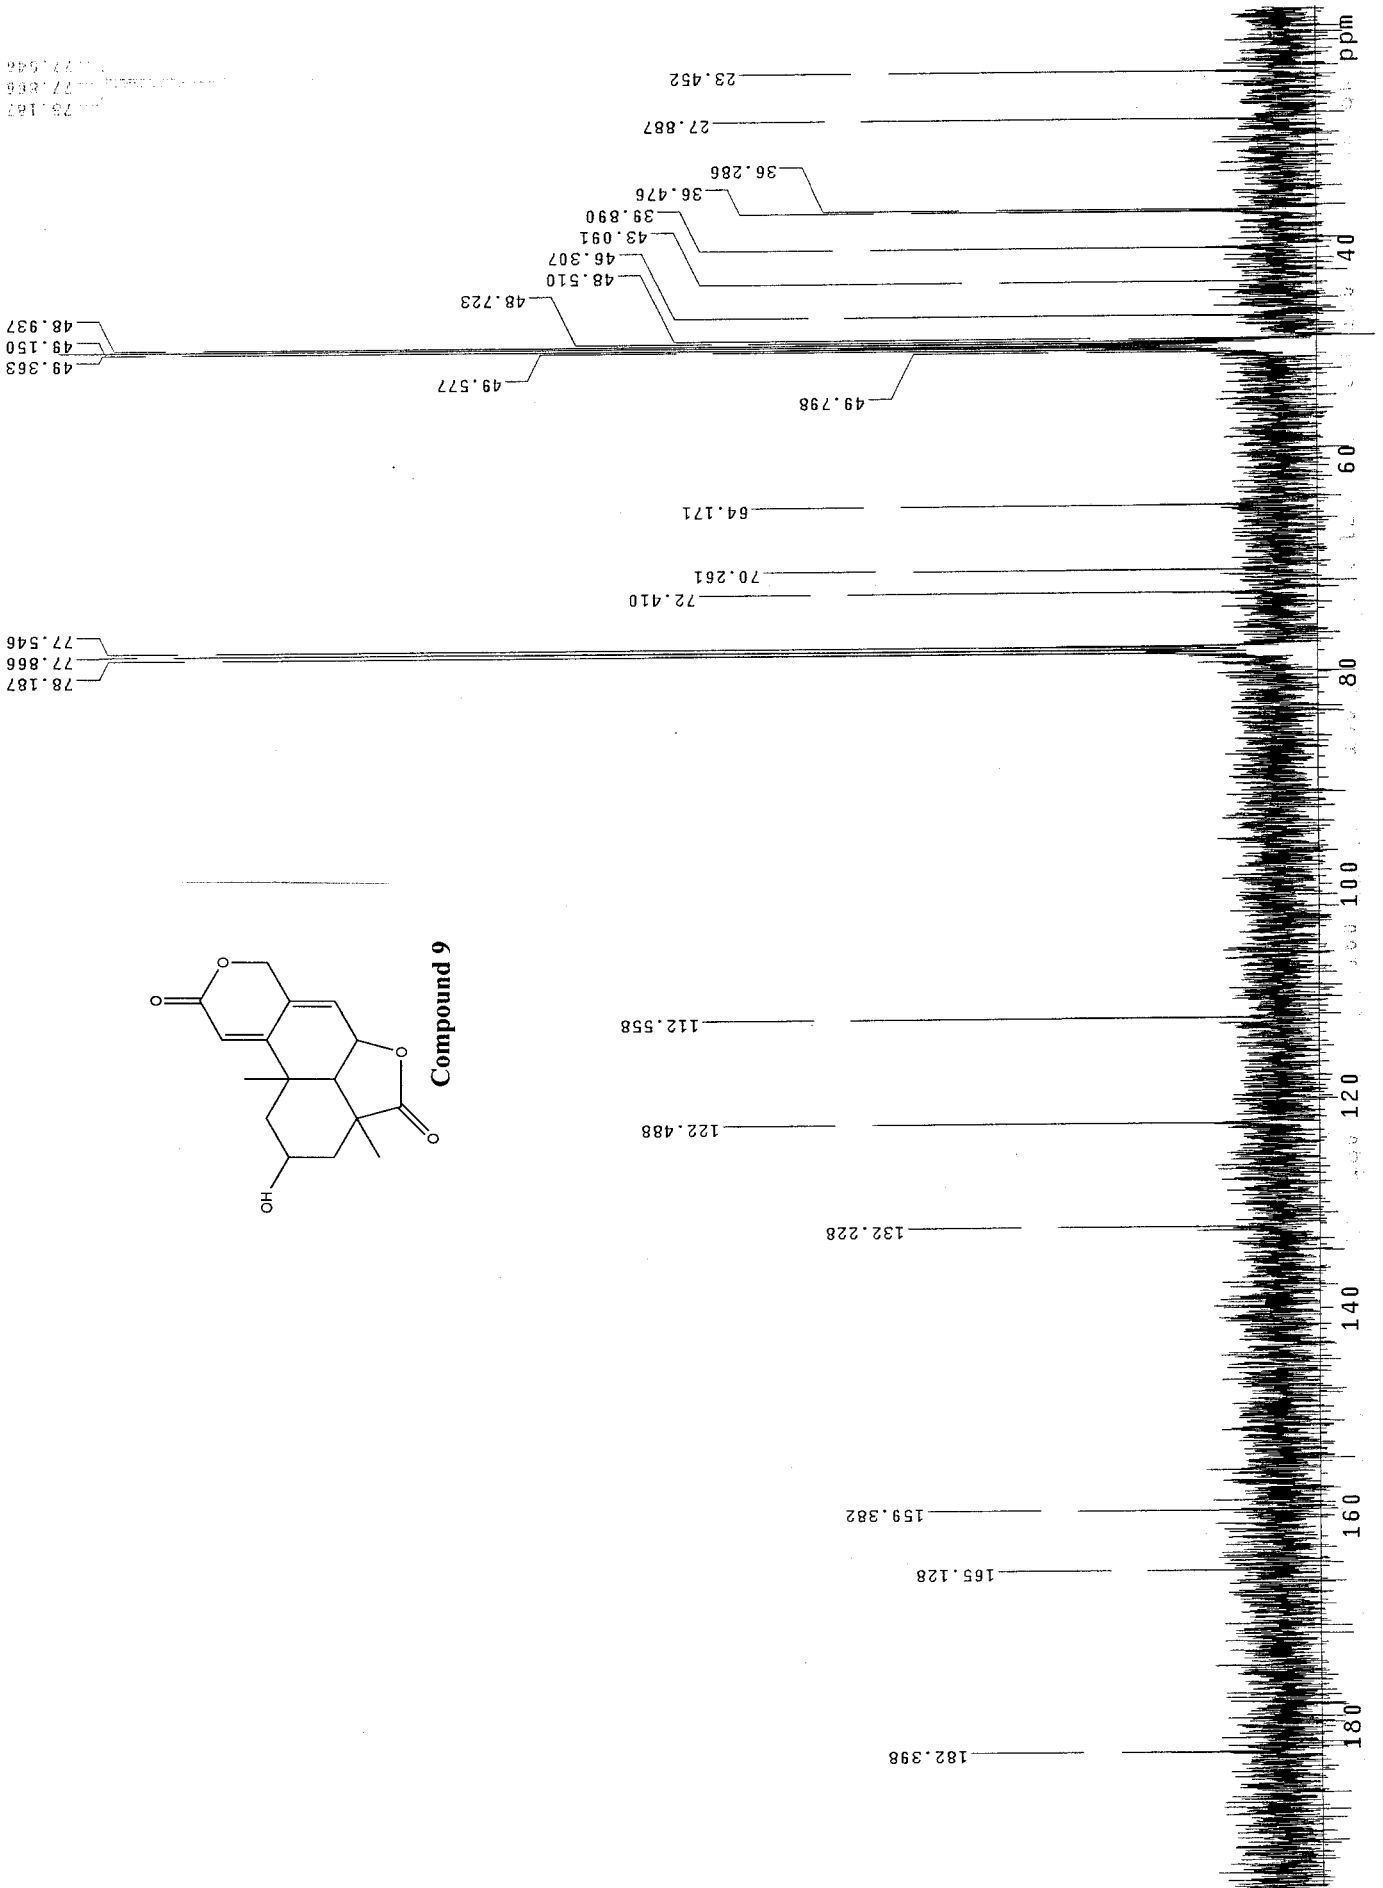

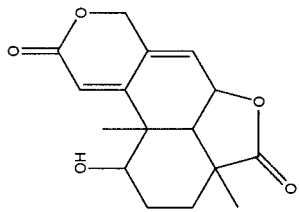

**Compound 10**

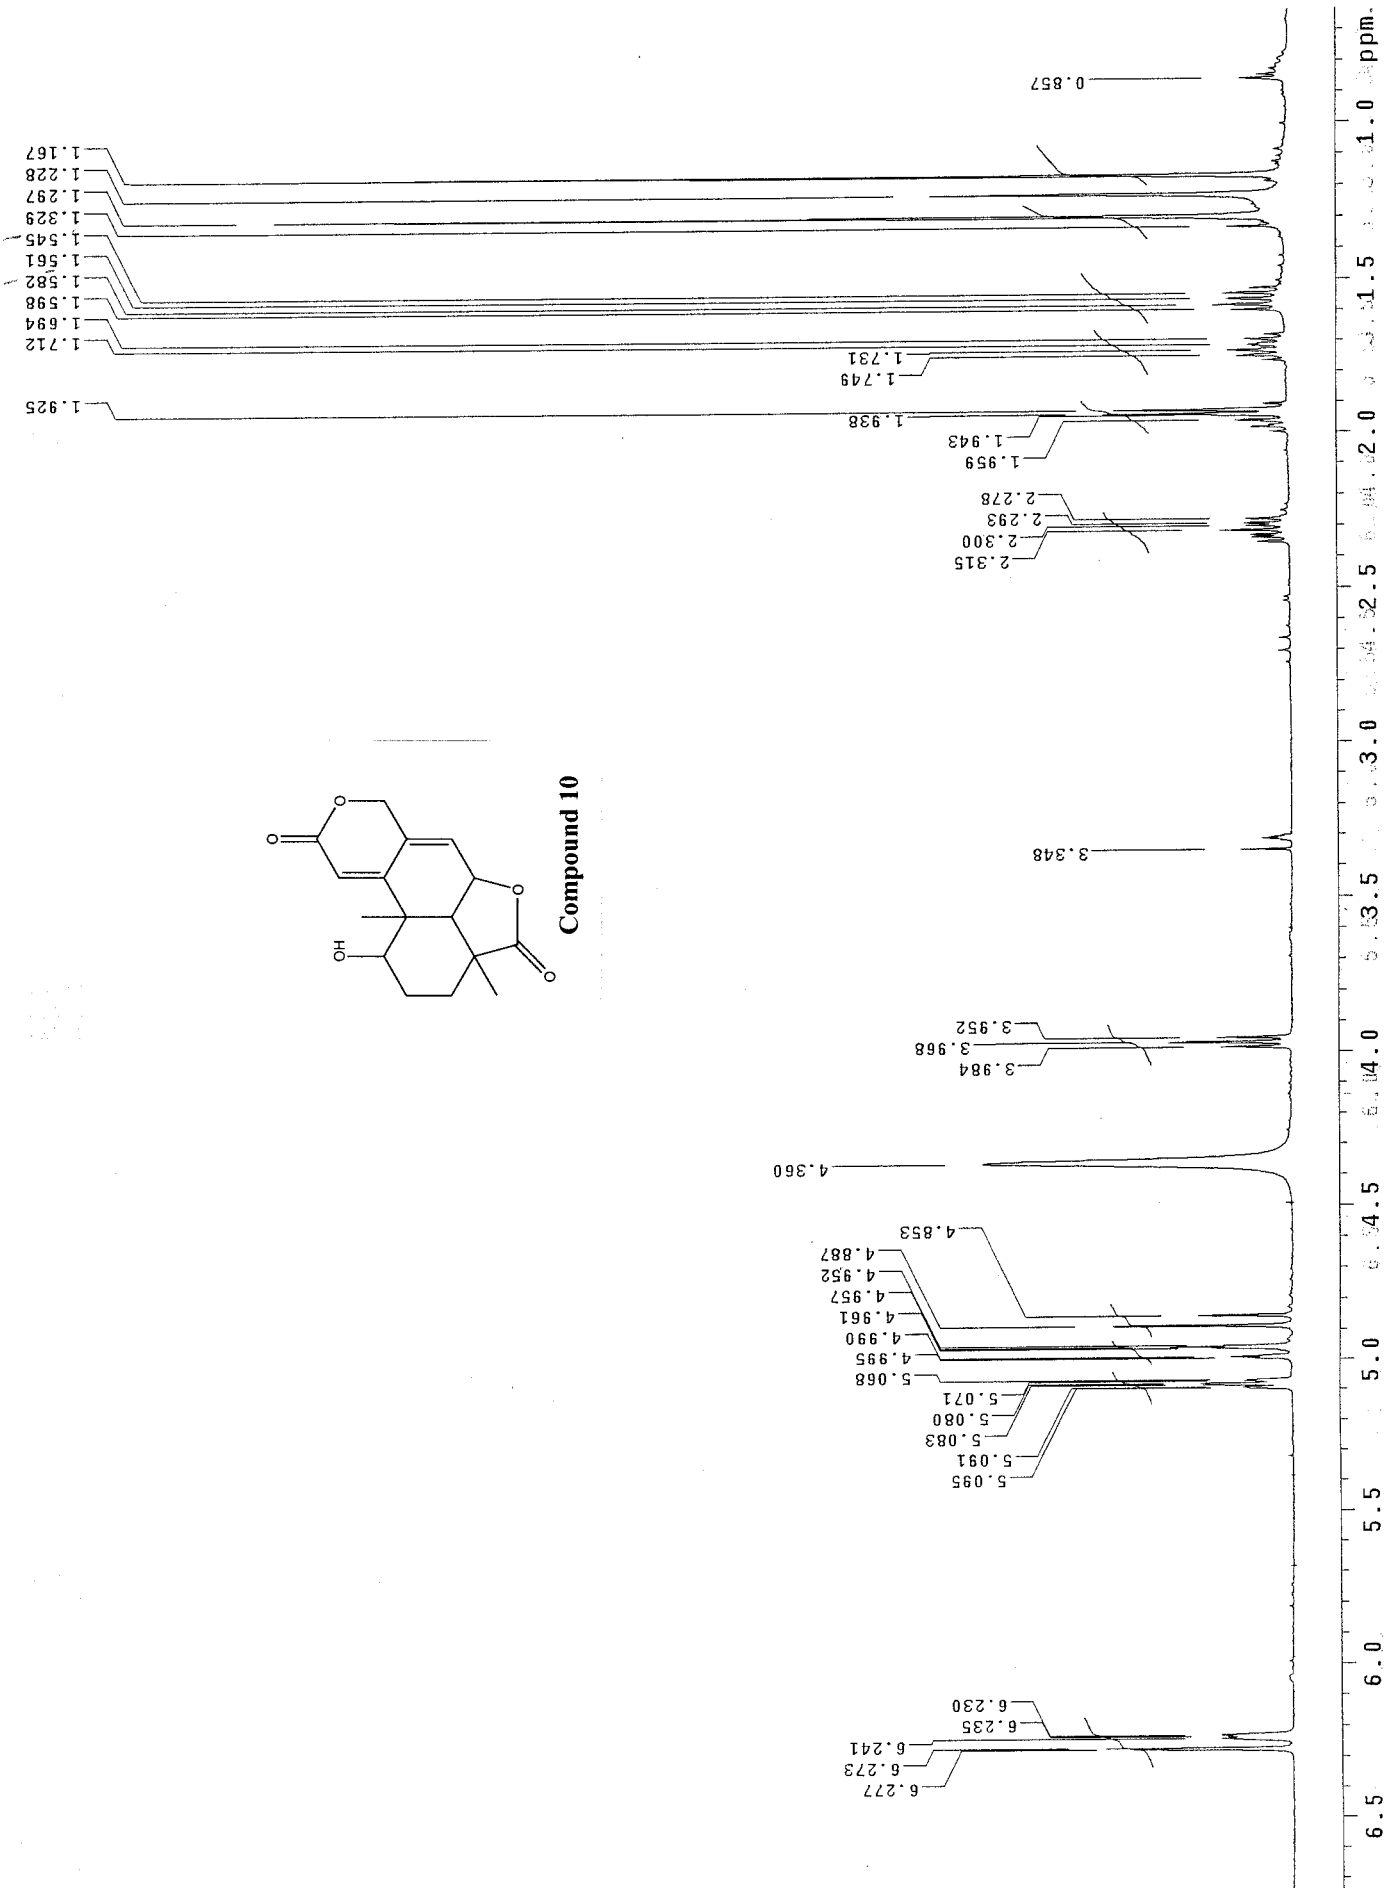

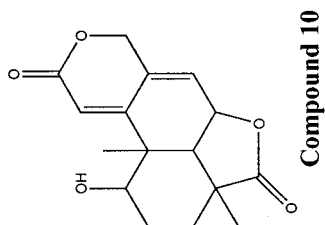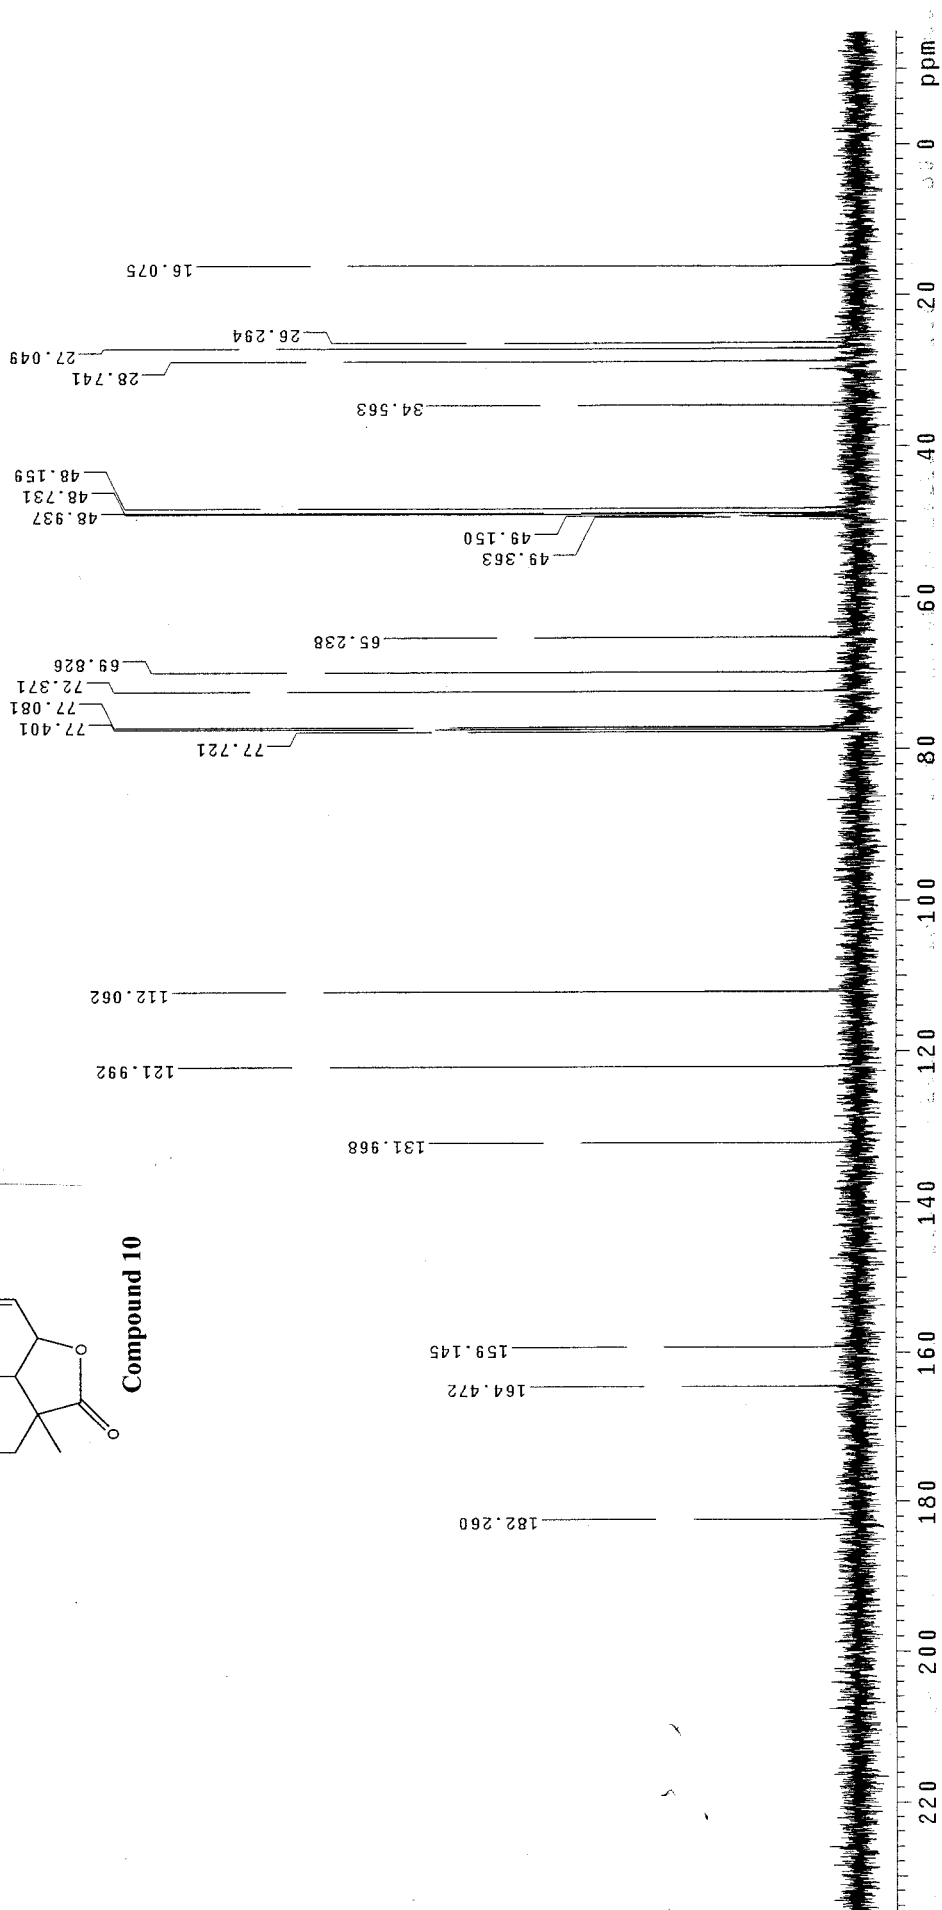

Supplement: NIHMS161443-supplement-1_si_001.pdf [file NIHMS161443-supplement-1_si_001.pdf]
